# Supplementary material
Source: publisher site journal article supplement (https://www.dovepress.com/article/433983)
Supplement: Supplementary file 1 [file get_supplementary_file.php]

**Supplementary figure 1. Outcome graphs displaying event rates and adjusted incidence rate ratios.**

With and without stratification for coronary artery disease.
A. Myocardial infarction.
B. Ischemic stroke.
C. All-cause mortality.

eGFR, estimated glomerular filtration rate. IRR, incidence rate ratio. CAD, coronary artery disease.

**
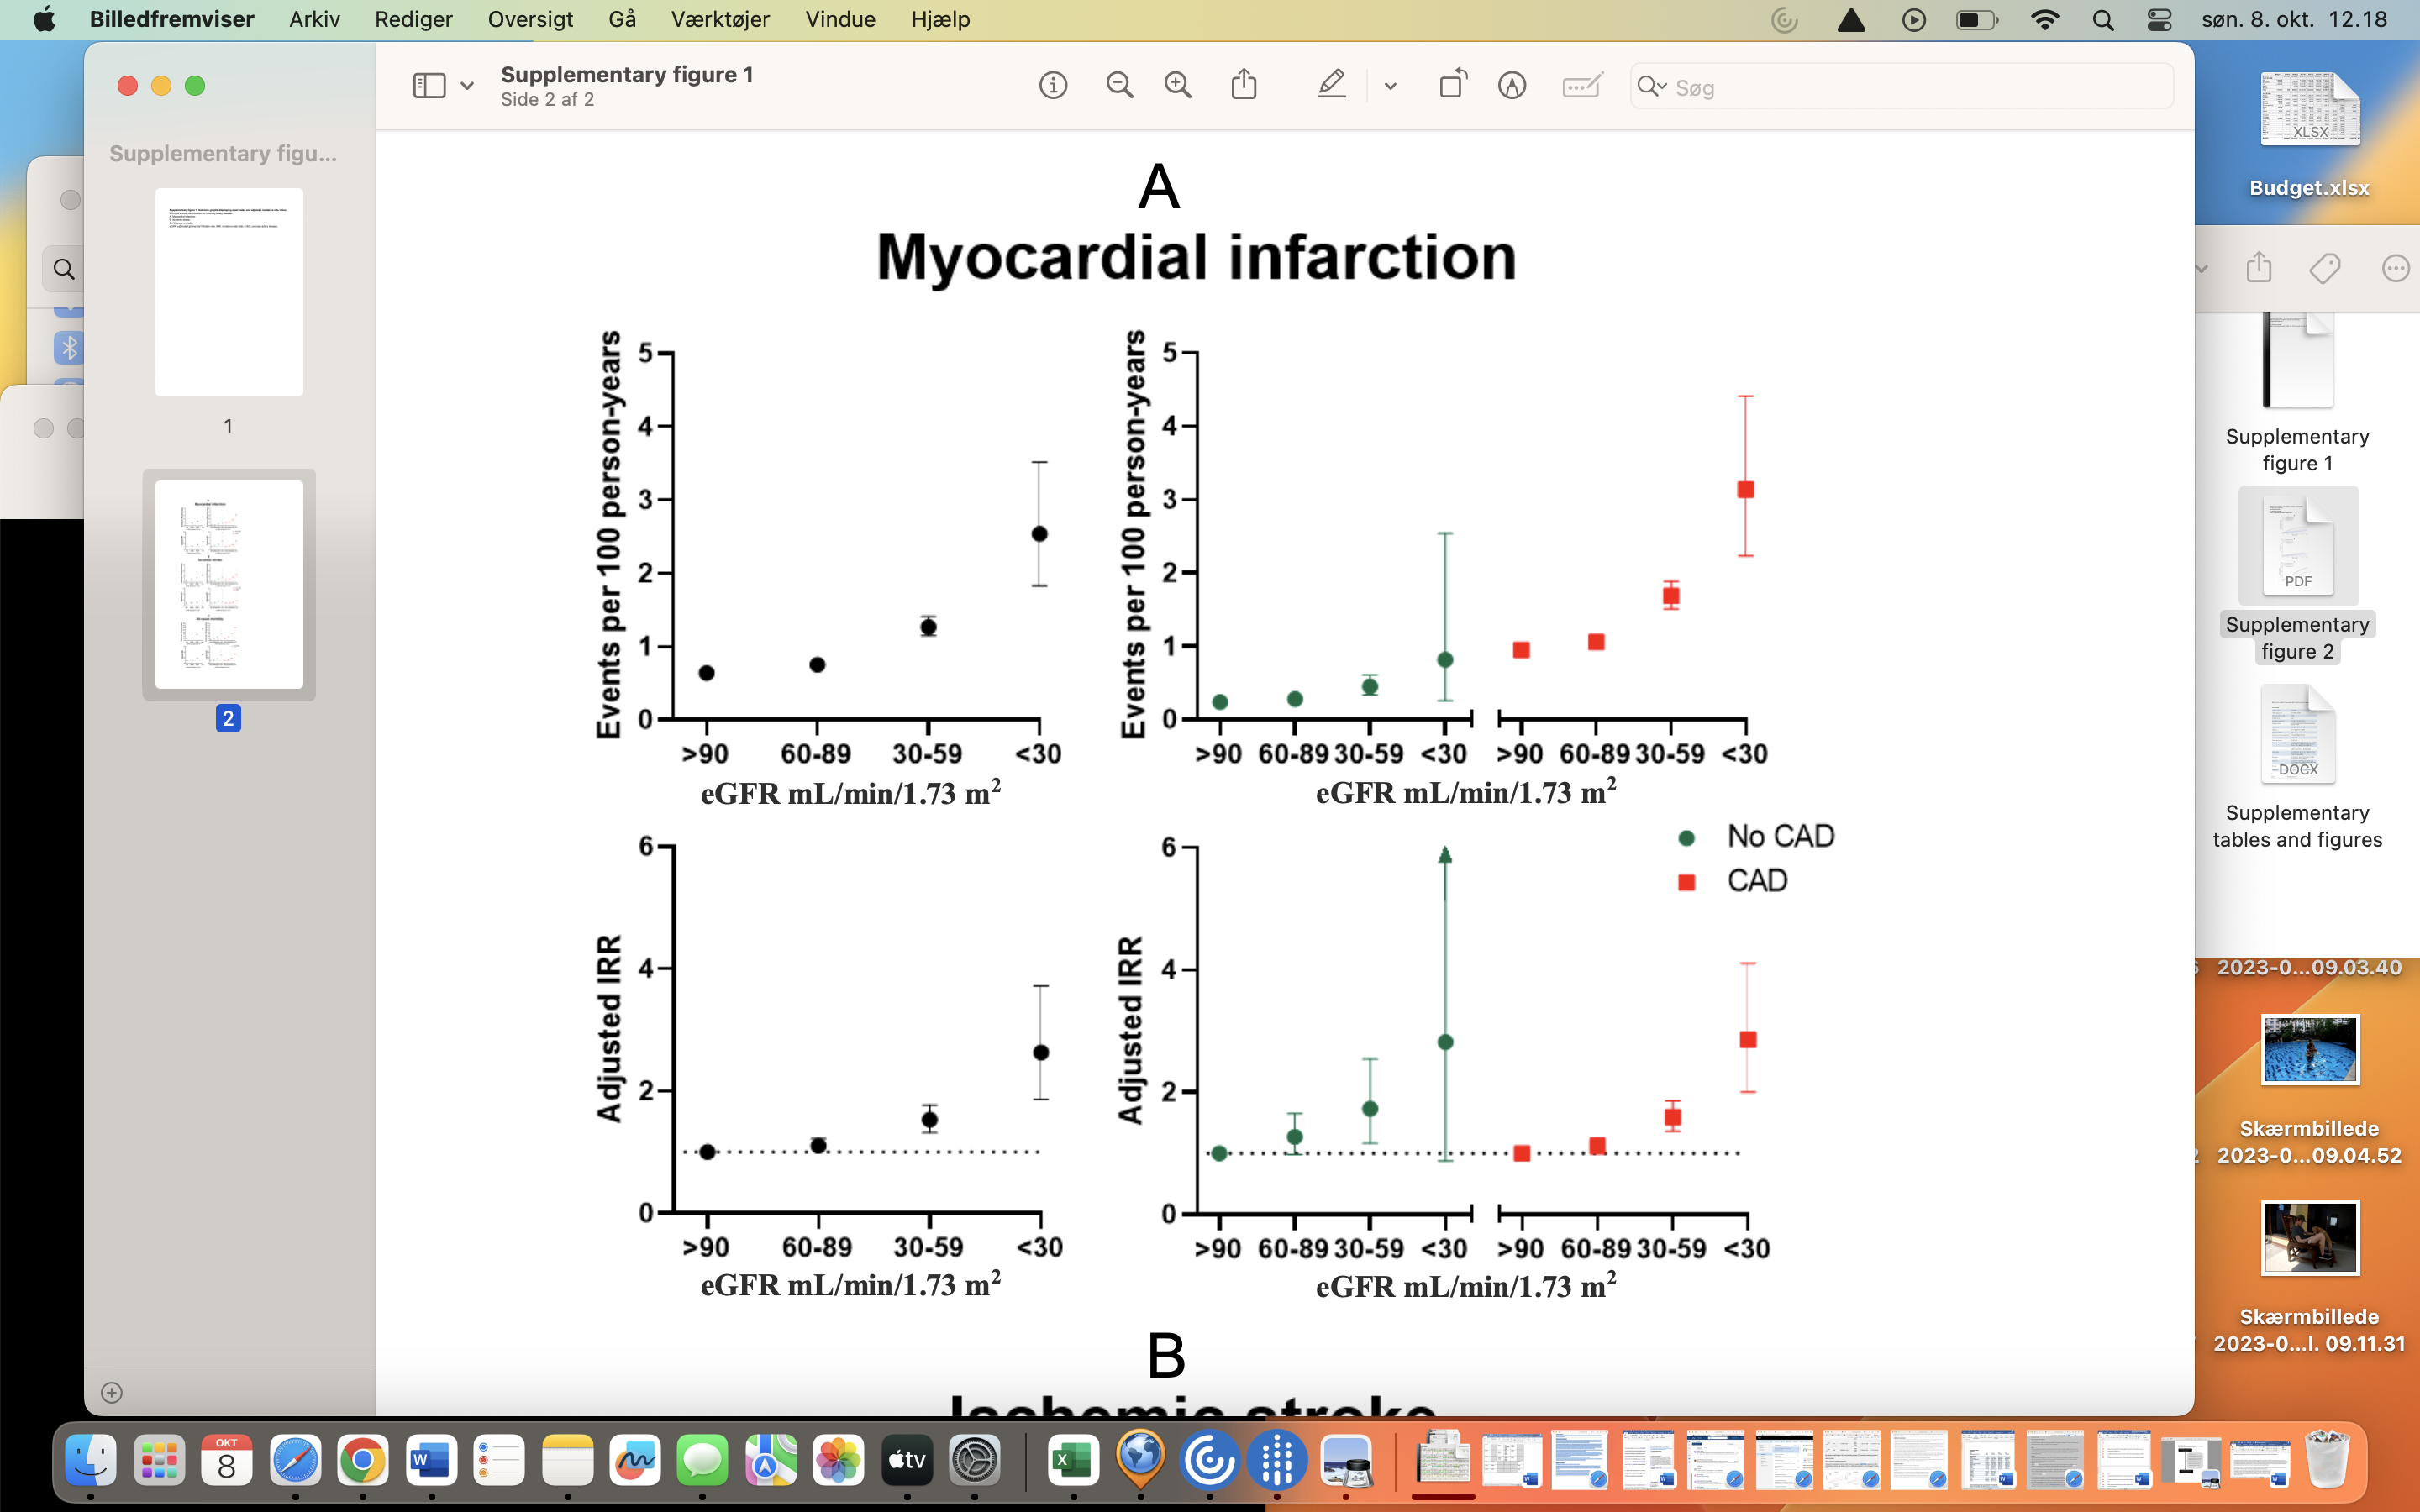
**

**
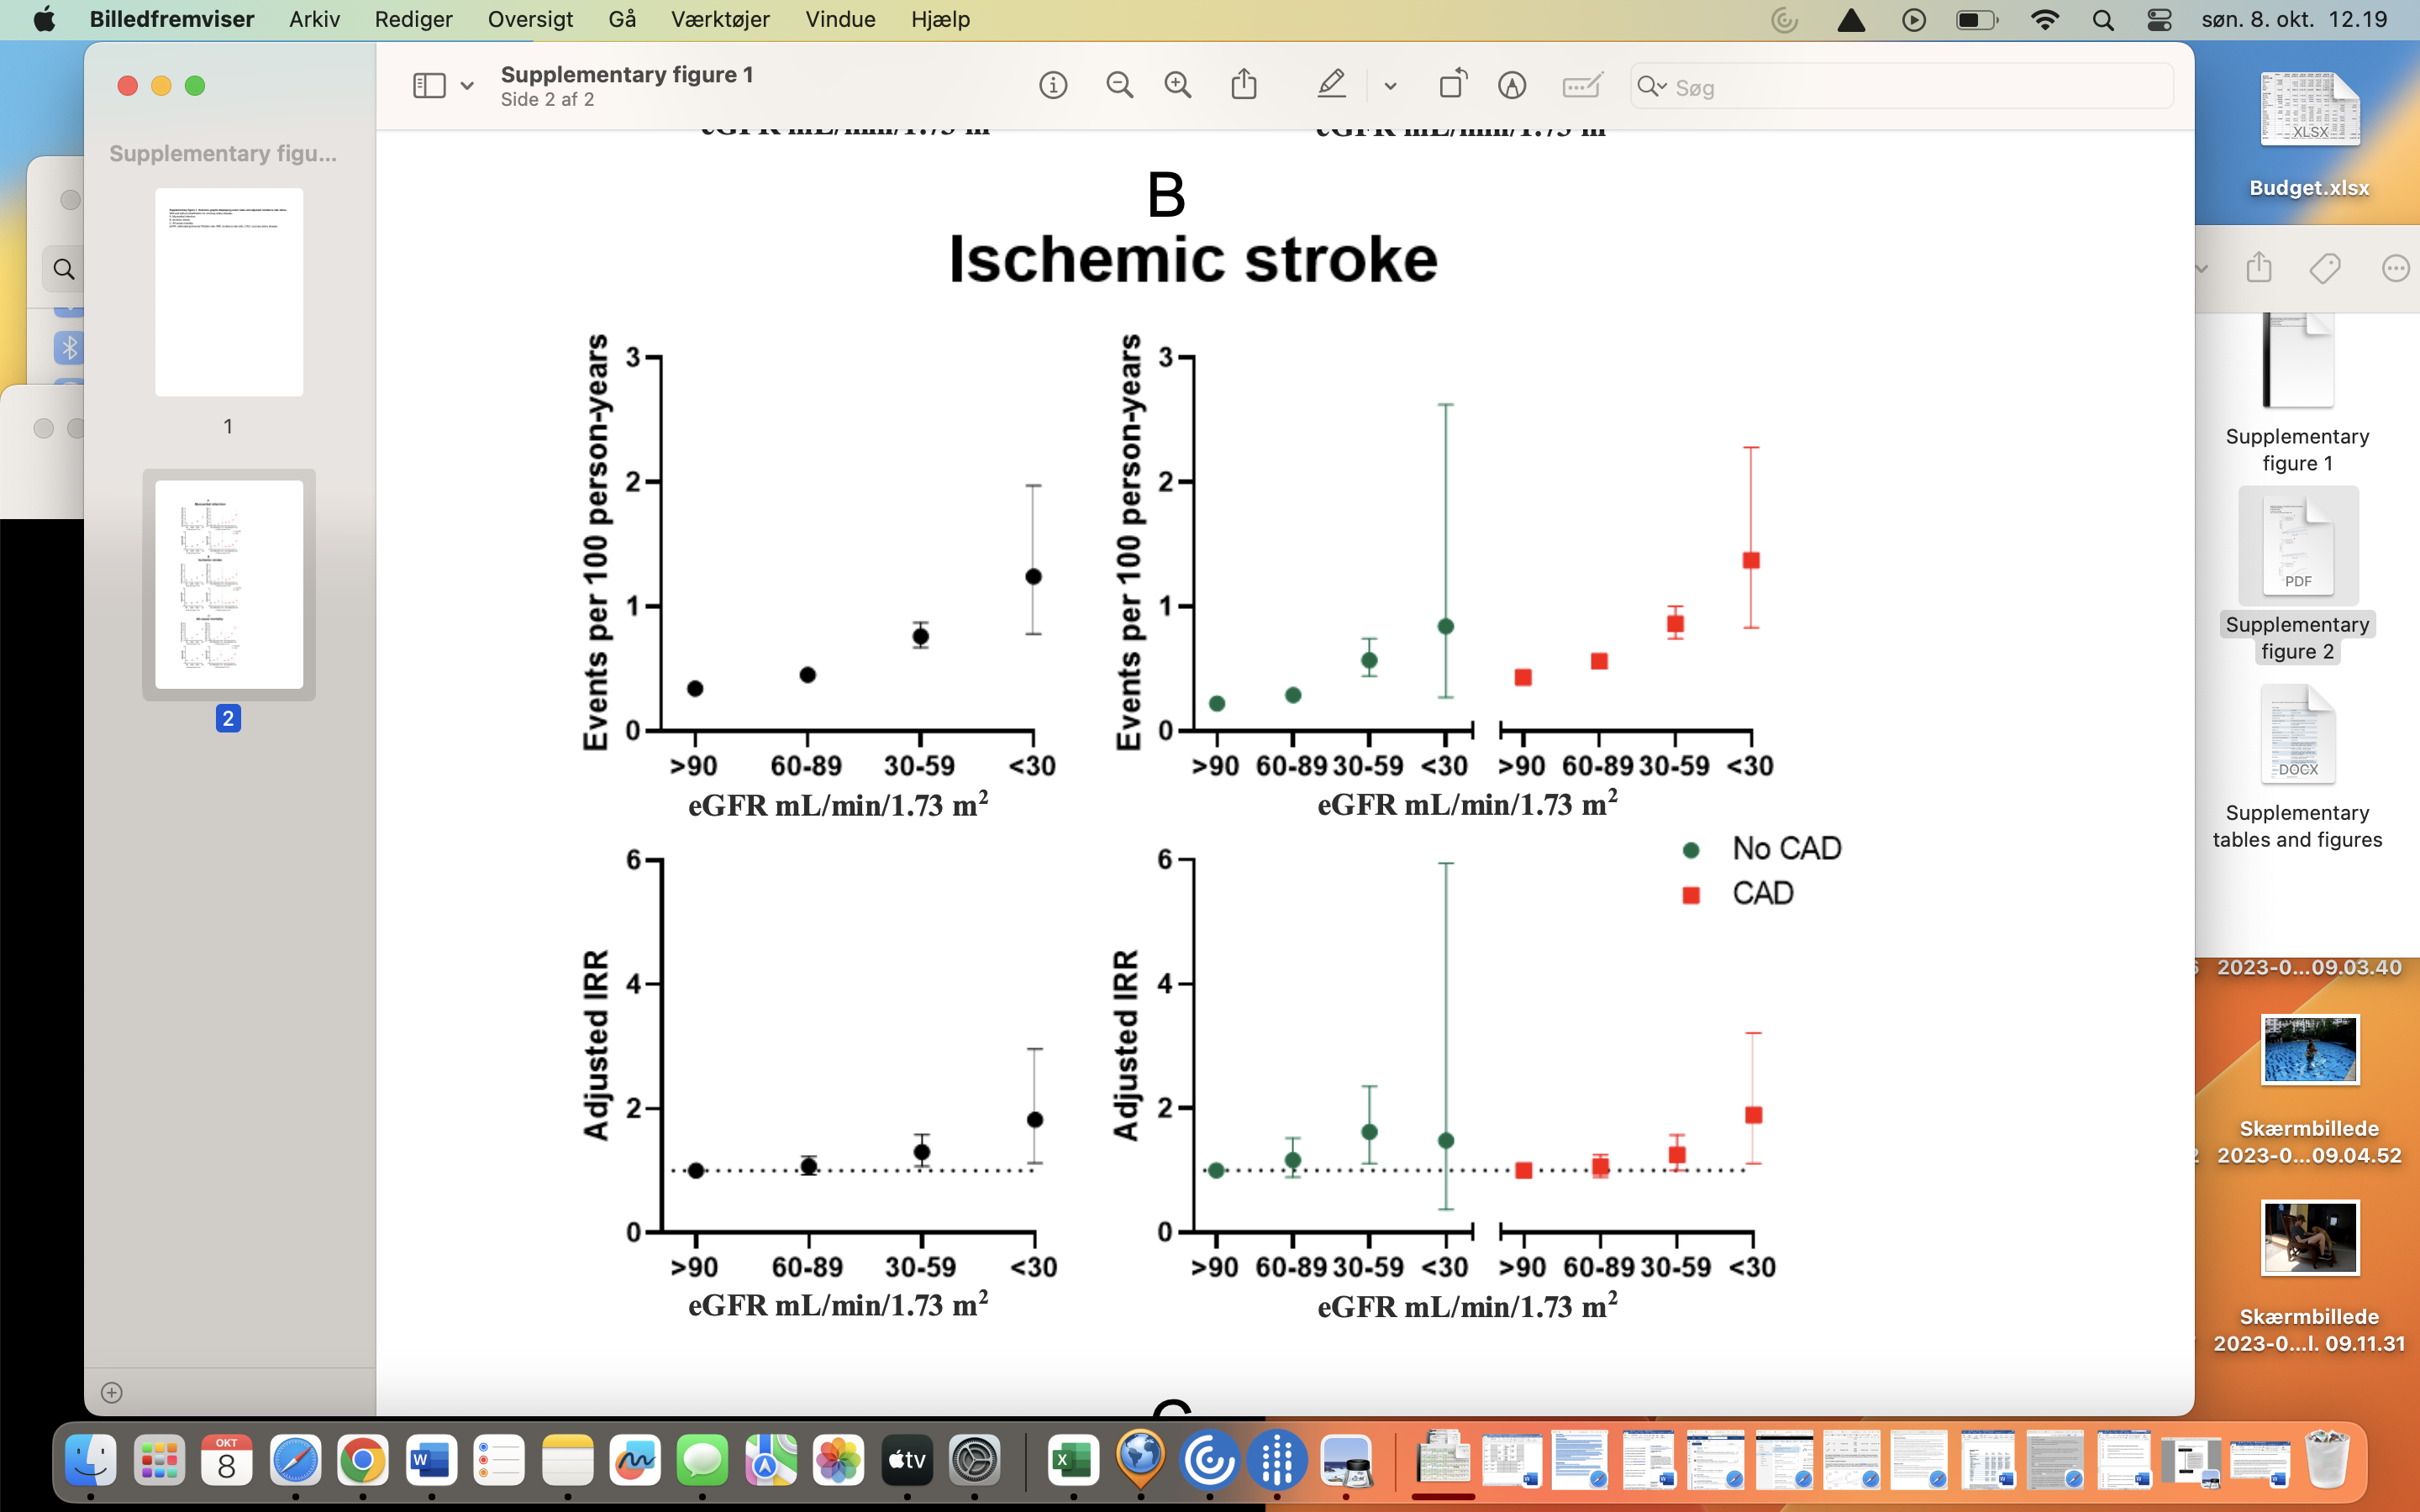
**

**
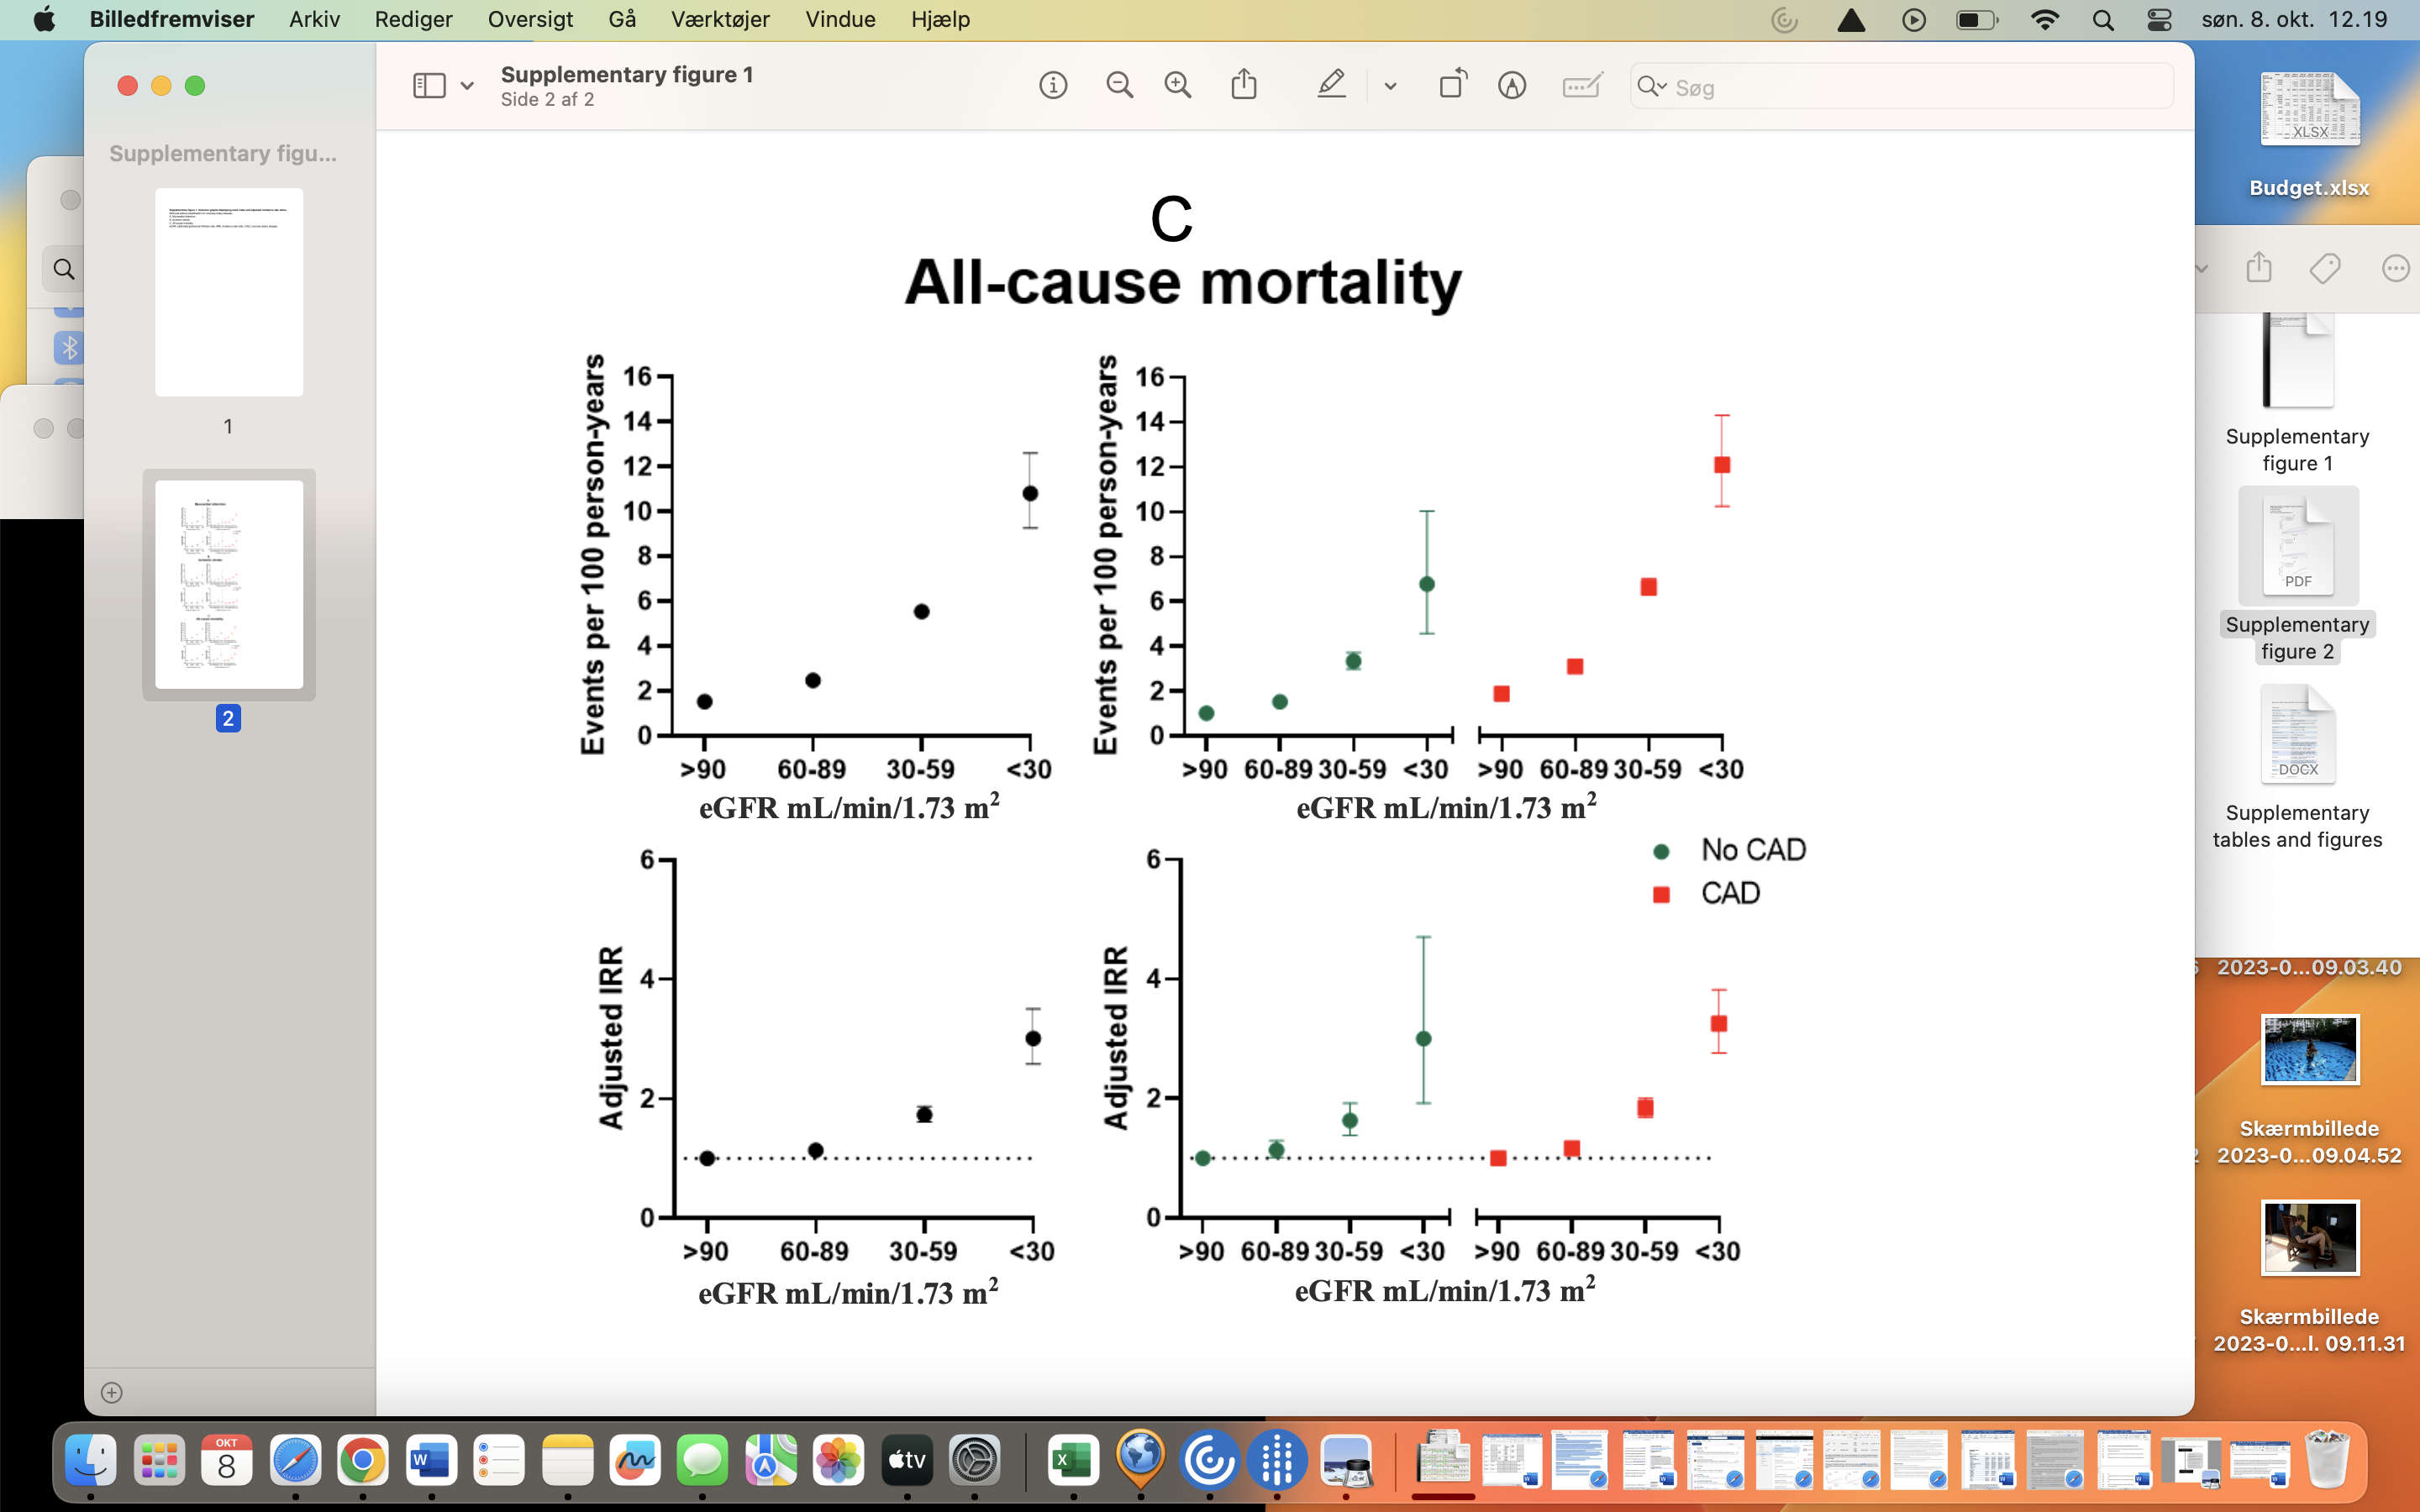
**

**Supplementary figure 2. Cumulative incidence proportions.**

A. Myocardial infarction.
B. Ischemic stroke.
C. All-cause mortality.
eGFR, estimated glomerular filtration rate.

**
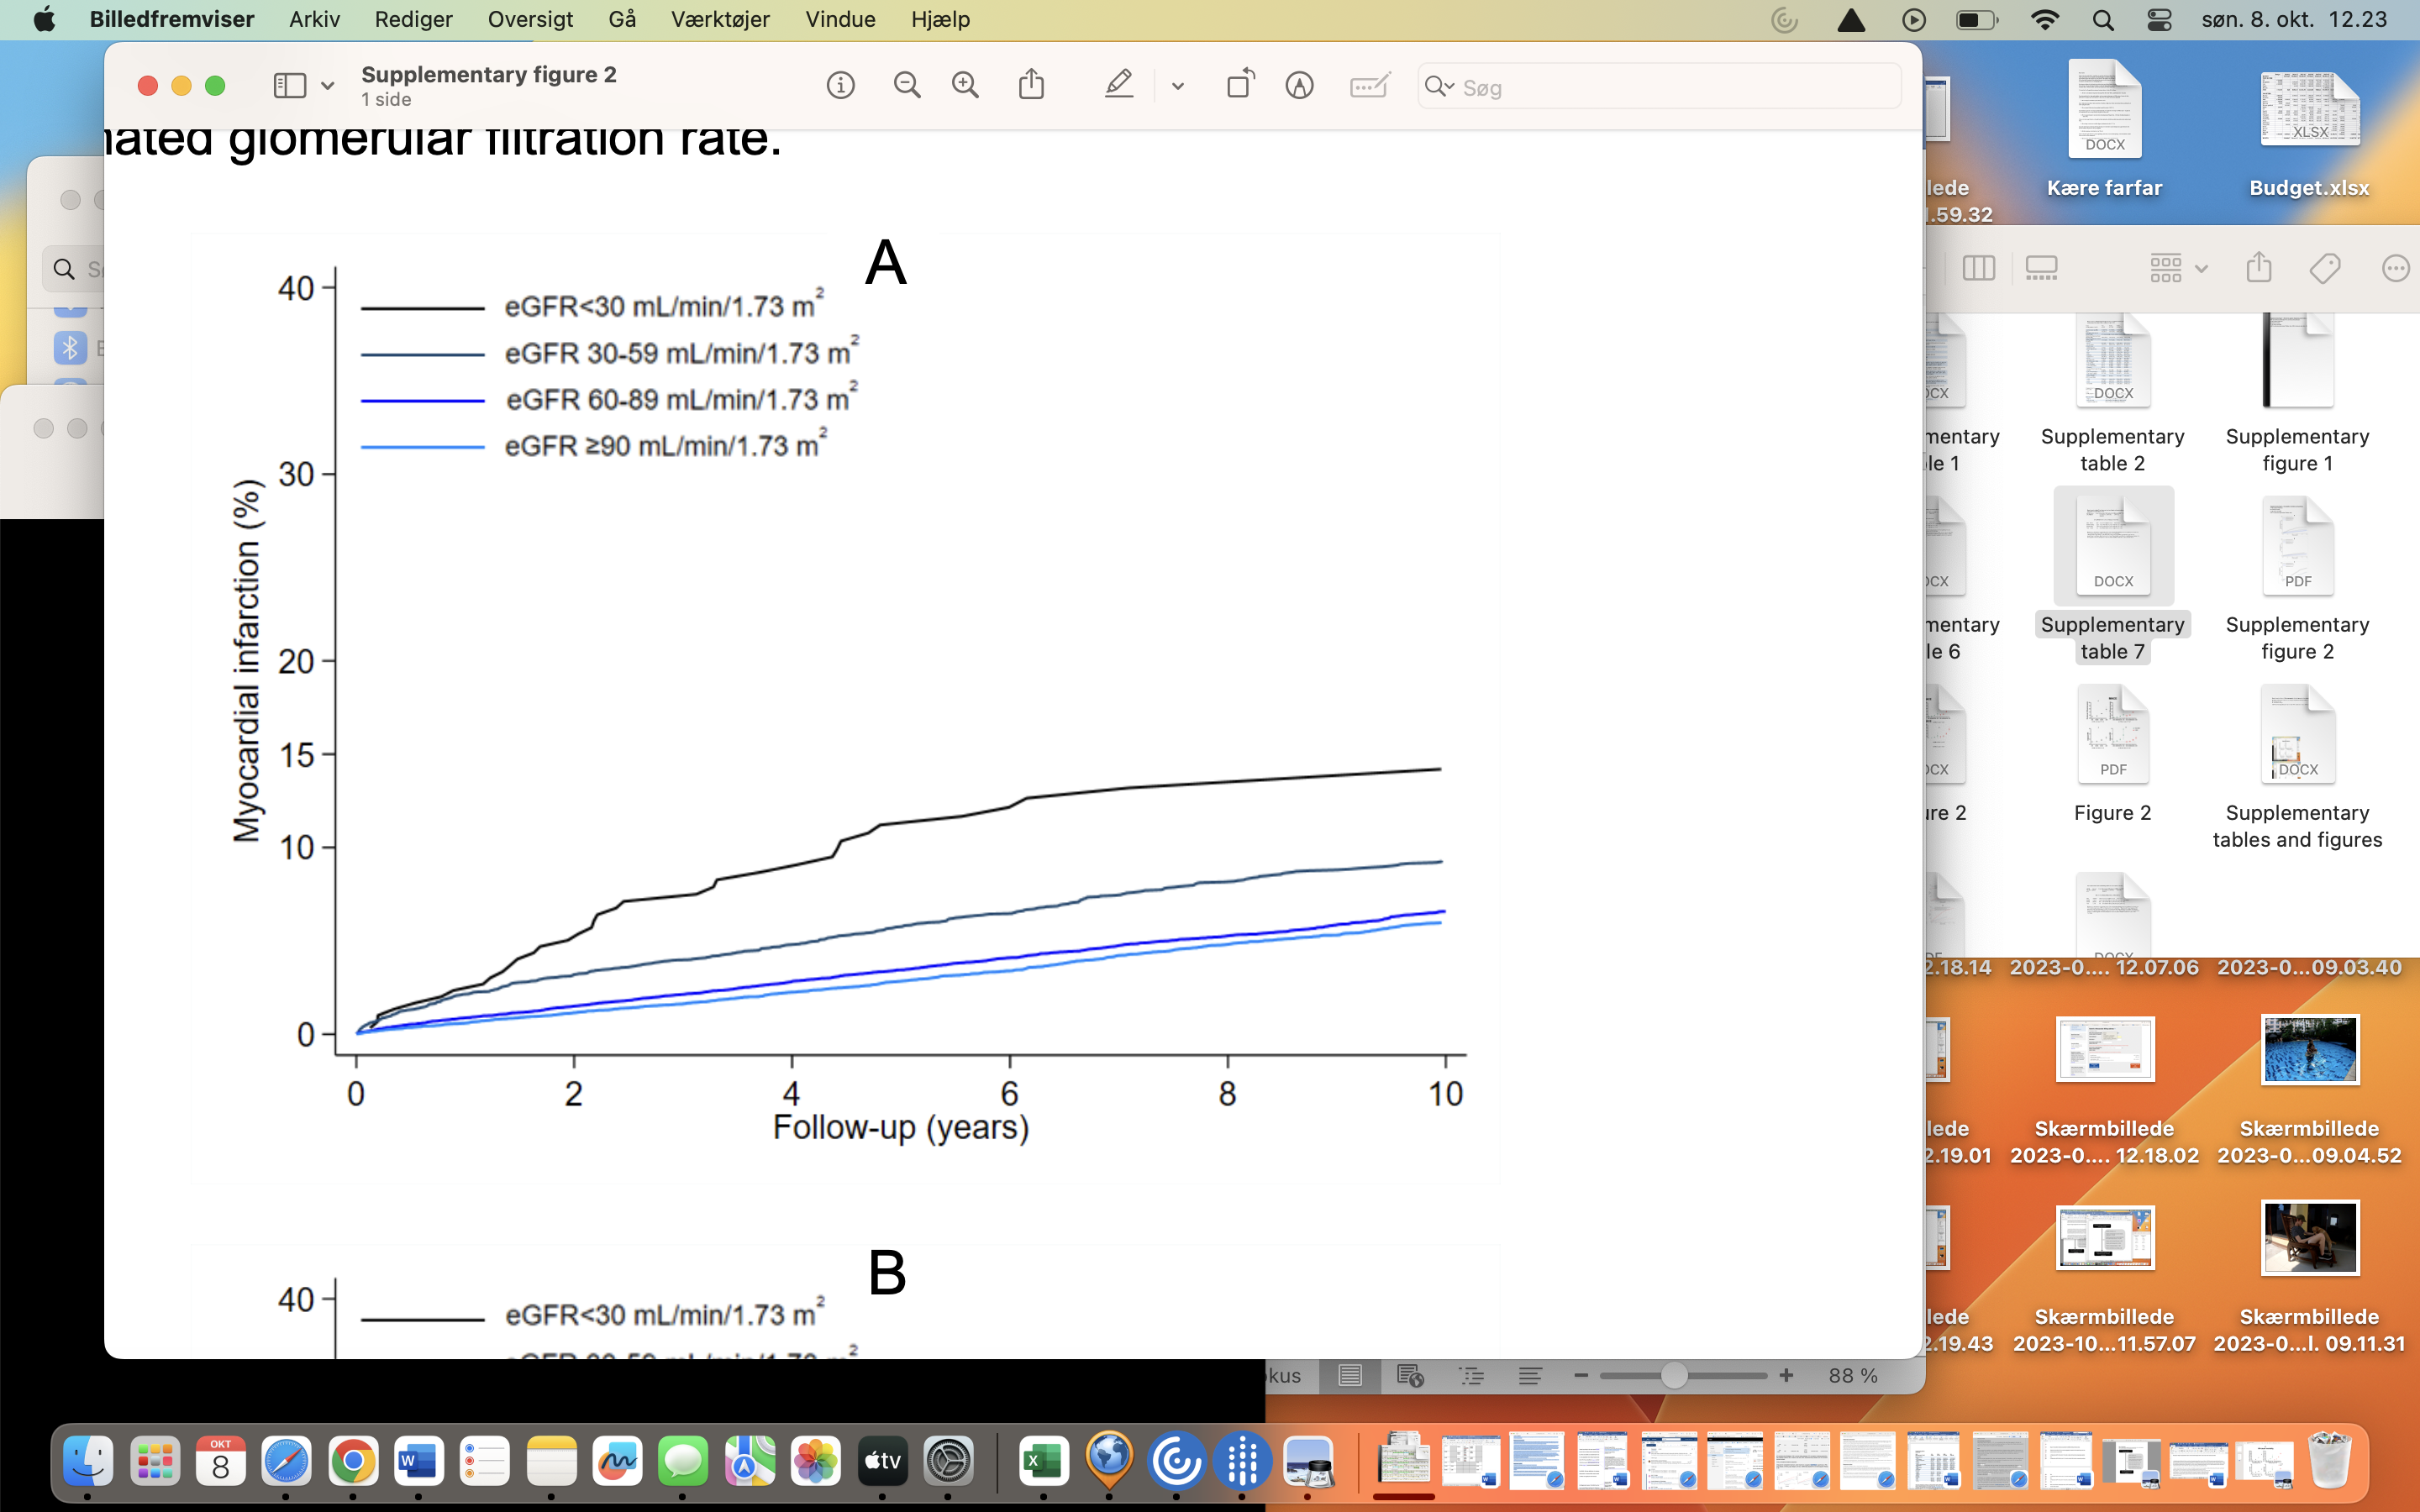
**

**
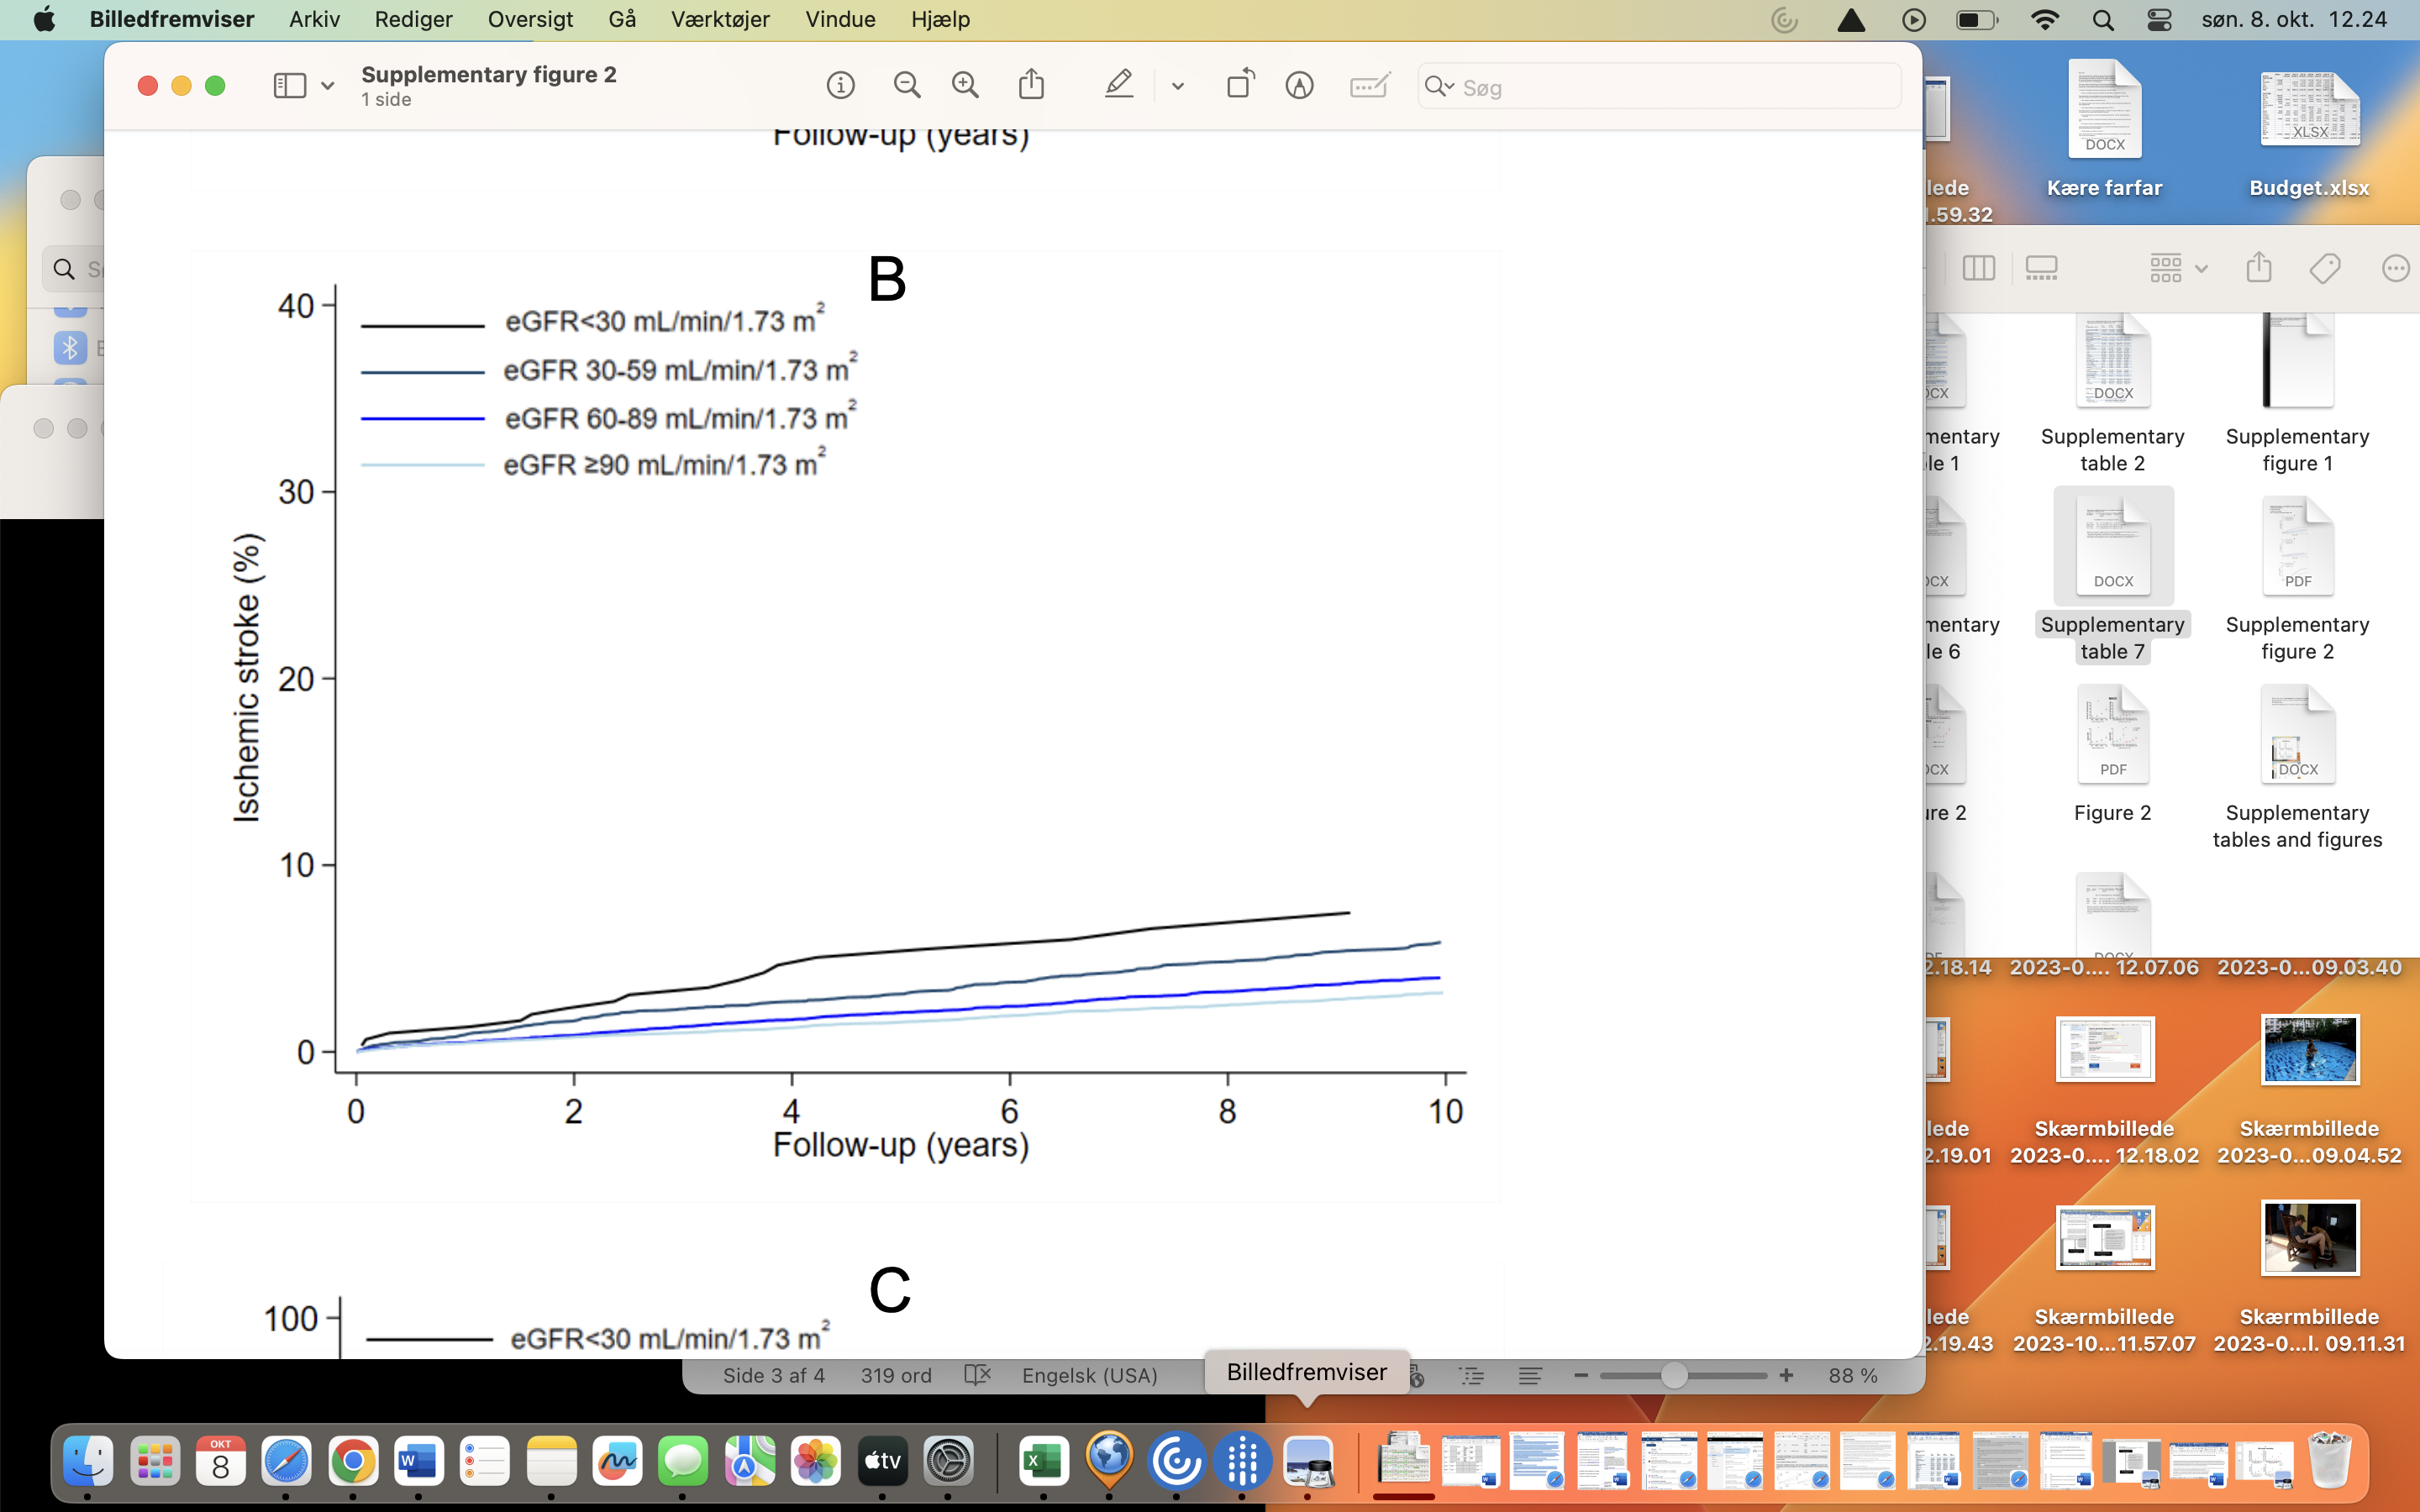
**

**
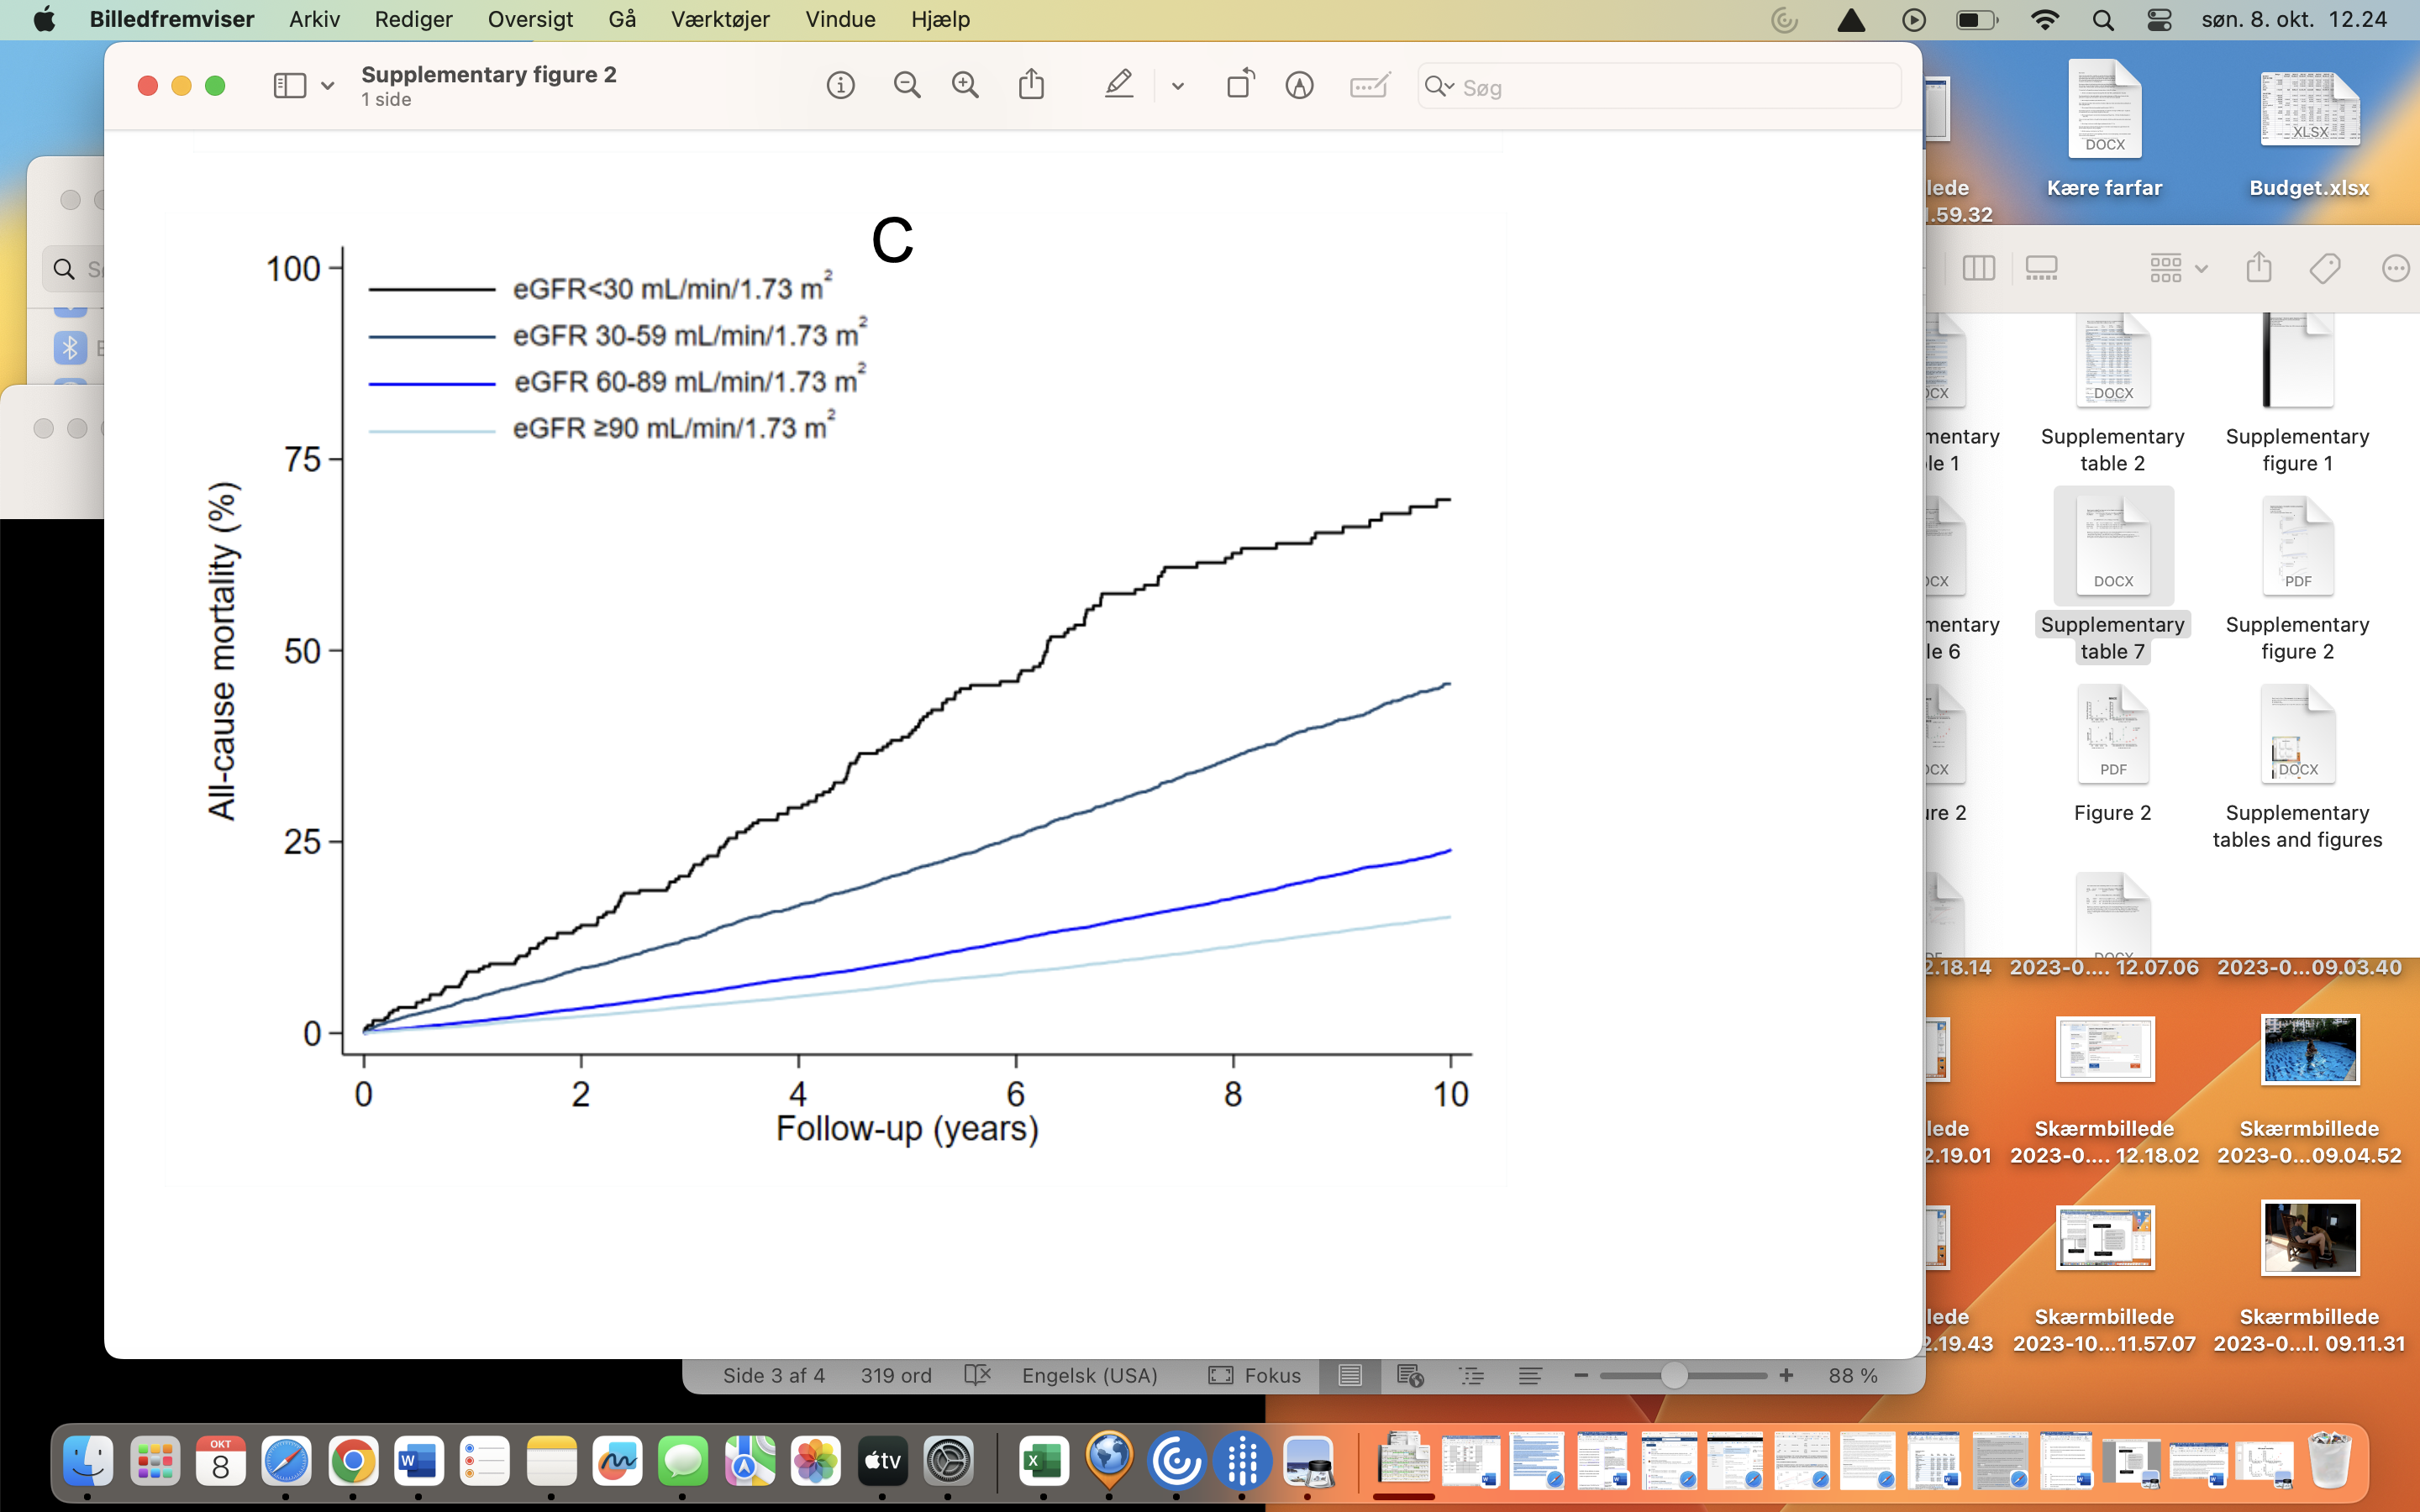
**

**Supplementary table 1. Codes used for definition of covariates and outcomes.**

|  |  |
| --- | --- |
| *ICD-10 codes* |  |
| Ischemic stroke | DI63, DI64 |
| Hemorrhagic stroke | DI60, DI61, DS06.6 |
| Transitory ischemic attack | DG45 |
| Atrial fibrillation | DI48 |
| Peripheral artery disease | DI70, DI70.1-DI70.9. DI73.9 |
| Diabetes mellitus | DE10-DE14, DH36.0, DO24.0-24.3, DO24.5-24.9, DG63.2, DN08.3 |
| Hypertension | DI10, DI15.1, DI15.8, DI15.9 |
| Heart failure with reduced ejection fraction | DI11.0, DI13.0, DI13.2, DI50 |
| Myocardial infarction | DI21 |
| Percutaneous coronary intervention | KFNG02, KFNG05, KFNG96 |
| Coronary artery bypass grafting | KFNA-KFNE |
| Cancer (any tumor) | DC00-DC75 |
| Dementia | DF00-DF03, DF10.73, DF11.73, DF12.73, DF13.73, DF14.73, DF15.73, DF16.73, DF18.73, DF19.73, DG23.1, DG30, DG31.0-DG31.1, DG31.8 |
| Chronic obstructive pulmonary disease | DJ40-DJ47, DJ60-DJ67, DJ68.4, DJ70.1, DJ70.3, DJ84.1, DJ92.0, DJ96.1, DJ98.2, DJ98.3 |
| Nephropathy | DR809, DB289A, DE102, DE112, DE122, DE132, DE142, DE143, DN06, DN07, DN08, DN14, DN16, DM103, DM350E, DN391 |
| Retinopathy | DE103, DE113, DE123, DE133, DE143, DH280, DH334B, DH34, DH350, DH360 |
| Neuropathy | DE104, DE114, DE124, DE134, DE144, DG56, DG57, DG58, DG59, DG609, DG603, DG61, DG62, DG63, DG900, DG909, DG99 |
| Dialysis | DZ992, BJFD20-27, BJFZ40, BJFZ45, KPBL30, KPBL99, KPBL20 |
| Cardiac death | I20-I25, I46, I47.2, I49, I50, R96, R98.9, R99.9 |

| *ATC codes* |  |
| --- | --- |
| Aspirin | B01AC06, N02BA01 |
| ADP-inhibitors | B01AC04, B01AC22, B01AC24 |
| Vitamin K-antagonists | B01AA03, B01AA04 |
| NOAC | B01AF02, B01AE07, B01AF01, B01AF03 |
| Thiazide | C03AA, C03AB |
| Statins | C10AA |
| Calcium channel blockers | C08C, C08D |
| Beta blockers | C07 |
| ARBs | C09C, C09D |
| ACE-inhibitors | C09A, C09B |
| Insulin | A10A |
| Non-insulin anti-diabetes agents | A10B |

*International Classification of Diseases, Tenth Revision* (ICD-10) codes from the Danish National Patient Registry, codes for comedications from the Danish National Health Service Prescription Database using the Anatomical Therapeutic Chemical (ATC) classification, and causes of deaths from the Cause of Death Registry used for definition of cardiac death.

**Supplementary table 2. Baseline characteristics of chronic coronary syndrome patients undergoing coronary angiography in Western Denmark with CAD.**

| | CAD  eGFR (mL/min/1.73 m2) | <30  n=235 | 30-59  n=3,303 | 60-89  n=10,978 | ≥90  n=12,011 | | --- | --- | --- | --- | --- | | Age mean (years) (IQR) | 74 (66, 79) | 75 (70, 80) | 70 (64, 75) | 62 (55, 67) | | Male | 133 (56.6) | 1507 (45.6) | 6895 (62.8) | 10005 (83.3) | | Body mass index median (kg/m2) (IQR) | 27.0 (24.0, 29.0) | 26.0 (24.0, 29.0) | 26.0 (24.0, 29.0) | 28.0 (26.0, 31.0) | | Systolic blood pressure mean (mmHg) (SD) | 148.0 (23.8) | 146.4 (22.5) | 146.0 (20.8) | 144.8 (19.9) | | Diastolic blood pressure mean (mmHg) (SD) | 76.5 (12.8) | 76.7 (12.0) | 79.6 (11.6) | 82.1 (11.3) | | Smoking | | | | | | Active | 34 (14.5) | 516 (15.6) | 2039 (18.6) | 3521 (29.3) | | Former/never | 180 (76.6) | 2,597 (78.6) | 8,502 (77.5) | 8,112 (67.6) | | Comorbidities | | | | | | Ischemic stroke | 17 (7.2) | 147 (4.5) | 254 (2.3) | 196 (1.6) | | Hemorrhagic stroke | 0 (0.0%) | 8 (0.2%) | 26 (0.2%) | 17 (0.1%) | | TIA | 11 (4.7) | 157 (4.8) | 343 (3.1) | 315 (2.6) | | AFib | 39 (16.6) | 523 (15.8) | 1210 (11.0) | 930 (7.7) | | PAD | 35 (14.9) | 411 (12.4) | 797 (7.3) | 659 (5.5) | | Diabetes | 83 (35.3) | 789 (23.9) | 1958 (17.8) | 2671 (22.2) | | Hypertension | 209 (88.9) | 2706 (81.9) | 7768 (70.8) | 7875 (65.6) | | HFrEF | 50 (21.3) | 536 (16.2) | 863 (7.9) | 666 (5.5) | | MI before CAG | 15 (6.4) | 133 (4.0) | 284 (2.6) | 288 (2.4) | | MI <30 days after CAG | 15 (6.4) | 29 (0.9) | 91 (0.8) | 77 (0.6) | | Previous PCI | 7 (3.0) | 76 (2.3) | 242 (2.2) | 283 (2.4) | | Previous CABG | 3 (1.3) | 26 (0.8) | 76 (0.7) | 70 (0.6) | | Cancer (any tumor) | 3 (1.3) | 26 (0.8) | 76 (0.7) | 70 (0.6) | | Dementia | 0 (0.0) | 17 (0.5) | 21 (0.2) | 22 (0.2) | | Chronic obstructive pulmonary disease | 23 (9.8) | 323 (9.8) | 814 (7.4) | 724 (6.0) | | Previous nephropathy | 51 (21.7) | 134 (4.1) | 102 (0.9) | 94 (0.8) | | Previous retinopathy | 34 (14.5) | 149 (4.5) | 292 (2.7) | 406 (3.4) | | Previous peripheral polyneuropathy | 14 (6.0) | 69 (2.1) | 134 (1.2) | 160 (1.3) | | CAD status at CAG |  |  |  |  | | 1 VD | 73 (31.1) | 1044 (31.6) | 3894 (35.5) | 4560 (38.0) | | 2 VD | 44 (18.7) | 726 (22.0) | 2466 (22.5) | 2645 (22.0) | | 3 VD | 85 (36.2) | 966 (29.2) | 2559 (23.3) | 2366 (19.7) | | Diffuse VD | 33 (14.0) | 567 (17.2) | 2059 (18.8) | 2440 (20.3) | | Medical treatment |  |  |  |  | | Aspirin | 189 (80.4) | 2778 (84.1) | 9354 (85.2) | 10,279 (85.6) | | ADP-inhibitors | 103 (43.8) | 1207 (36.5) | 3980 (36.3) | 4631 (38.6) | | Vitamin K-antagonists | 35 (14.9) | 392 (11.9) | 906 (8.3) | 665 (5.5) | | NOAC | 6 (2.6) | 72 (2.2) | 222 (2.0) | 164 (1.4) | | Thiazide | 43 (18.3) | 866 (26.2) | 2117 (19.3) | 1786 (14.9) | | Statins | 200 (85.1) | 2853 (86.4) | 9888 (90.1) | 10967 (91.3) | | Calcium channel blockers | 135 (57.4) | 1530 (46.3) | 4484 (40.8) | 4491 (37.4) | | Beta blockers | 180 (76.6) | 2391 (72.4) | 7328 (66.8) | 7648 (63.7) | | ARBs | 97 (41.3) | 953 (28.9) | 2297 (20.9) | 2258 (18.8) | | ACE-inhibitors | 106 (45.1) | 1357 (41.1) | 3617 (32.9) | 3699 (30.8) | | Insulin | 53 (22.6) | 295 (8.9) | 597 (5.4) | 815 (6.8) | | Non-insulin | 31 (13.2) | 455 (13.8) | 1312 (12.0) | 1962 (16.3) | | CCS Scale |  |  |  |  | | Grade I | 28 (11.9) | 446 (13.5) | 1722 (15.7) | 1928 (16.1) | | Grade II | 146 (62.1) | 2077 (62.9) | 7183 (65.4) | 7915 (65.9) | | Grade III | 54 (23.0) | 647 (19.6) | 1638 (14.9) | 1636 (13.6) | | Grade IV | 1 (0.4) | 22 (0.7) | 47 (0.4) | 62 (0.5) | | Missing | 6 (2.6) | 111 (3.4) | 388 (3.5) | 470 (3.9) | | CCI Group |  |  |  |  | | CCI 0 | 50 (21.3) | 1553 (47.0) | 6994 (63.7) | 8042 (67.0) | | CCI 1 | 33 (14.0) | 695 (21.0) | 1995 (18.2) | 2191 (18.2) | | CCI 2 | 48 (20.4) | 474 (14.4) | 1059 (9.6) | 954 (7.9) | | CCI >2 | 104 (44.3) | 581 (17.6) | 930 (8.5) | 824 (6.9) |   Values are indicated as number (%), unless otherwise stated. eGFR, estimated glomerular filtration rate. SD, standard deviation. IQR, interquartile range. TIA, transient ischemic attack. AFib, atrial fibrillation. PAD, peripheral artery disease. HFrEF, heart failure with reduced ejection fraction. MI, myocardial infarction. CAG, coronary angiography. PCI, percutaneous coronary intervention. CABG, coronary artery bypass grafting. CAD, coronary artery disease. VD, vessel disease. ADP, adenosine diphosphate receptor. NOAC, non-vitamin K antagonist oral anticoagulants. ARBs, angiotensin receptor blockers. ACE, angiotensin-converting enzyme. CCS, Canadian Cardiovascular Society. CCI, Charlson Comorbidity Index. |
| --- | --- | --- | --- | --- | --- | --- | --- | --- | --- | --- | --- | --- | --- | --- | --- | --- | --- | --- | --- | --- | --- | --- | --- | --- | --- | --- | --- | --- | --- | --- | --- | --- | --- | --- | --- | --- | --- | --- | --- | --- | --- | --- | --- | --- | --- | --- | --- | --- | --- | --- | --- | --- | --- | --- | --- | --- | --- | --- | --- | --- | --- | --- | --- | --- | --- | --- | --- | --- | --- | --- | --- | --- | --- | --- | --- | --- | --- | --- | --- | --- | --- | --- | --- | --- | --- | --- | --- | --- | --- | --- | --- | --- | --- | --- | --- | --- | --- | --- | --- | --- | --- | --- | --- | --- | --- | --- | --- | --- | --- | --- | --- | --- | --- | --- | --- | --- | --- | --- | --- | --- | --- | --- | --- | --- | --- | --- | --- | --- | --- | --- | --- | --- | --- | --- | --- | --- | --- | --- | --- | --- | --- | --- | --- | --- | --- | --- | --- | --- | --- | --- | --- | --- | --- | --- | --- | --- | --- | --- | --- | --- | --- | --- | --- | --- | --- | --- | --- | --- | --- | --- | --- | --- | --- | --- | --- | --- | --- | --- | --- | --- | --- | --- | --- | --- | --- | --- | --- | --- | --- | --- | --- | --- | --- | --- | --- | --- | --- | --- | --- | --- | --- | --- | --- | --- | --- | --- | --- | --- | --- | --- | --- | --- | --- | --- | --- | --- | --- | --- | --- | --- | --- | --- | --- | --- | --- | --- | --- | --- | --- | --- | --- | --- | --- | --- | --- | --- | --- | --- | --- | --- | --- | --- | --- | --- | --- | --- | --- | --- | --- | --- | --- | --- | --- | --- | --- | --- | --- | --- | --- | --- | --- | --- | --- | --- | --- | --- | --- | --- | --- | --- | --- | --- | --- | --- | --- | --- | --- | --- | --- | --- | --- | --- | --- | --- | --- |

**Supplementary table 3. Baseline characteristics of chronic coronary syndrome patients undergoing coronary angiography in Western Denmark without CAD.**

| No-CAD  eGFR (mL/min/1.73 m2) | <30  n=63 | 30-59  n=1,413 | 60-89  n=6,474 | ≥90  n=8,134 |
| --- | --- | --- | --- | --- |
| Age mean (years) (IQR) | 72 (64, 77) | 72 (65, 77) | 66 (59, 71) | 57 (50, 63) |
| Male | 24 (38.1) | 256 (18.1) | 1931 (29.8) | 4991 (61.4) |
| Body mass index median (kg/m2) (IQR) | 26.0 (23.0, 29.0) | 26.0 (23.0, 29.0) | 26.0 (23.0, 29.0) | 28.0 (25.0, 32.0) |
| Systolic blood pressure mean (mmHg) (SD) | 139.3 (22.0) | 143.5 (21.9) | 143.1 (20.6) | 140.3 (19.3) |
| Diastolic blood pressure mean (mmHg) (SD) | 75.9 (14.1) | 76.9 (11.8) | 79.6 (11.3) | 81.7 (11.1) |
| Smoking | | | | |
| Active | 7 (11.1) | 217 (15.4) | 1033 (16.0) | 2248 (27.6) |
| Former/never | 51 (80.9) | 1,126 (79.7) | 5,151 (79.5) | 5,631 (69.3) |
| Missing | 5 (7.9) | 70 (5.0) | 290 (4.5) | 255 (3.1) |
| Comorbidities | | | | |
| Ischemic stroke | 4 (6.3) | 47 (3.3) | 97 (1.5) | 79 (1.0) |
| Hemorrhagic stroke | 1 (1.6) | 3 (0.2) | 5 (0.1) | 6 (0.1) |
| TIA | 2 (3.2) | 44 (3.1) | 182 (2.8) | 162 (2.0) |
| AFib | 9 (14.3) | 237 (16.8) | 733 (11.3) | 681 (8.4) |
| PAD | 2 (3.2) | 61 (4.3) | 178 (2.7) | 163 (2.0) |
| Diabetes | 17 (27.0) | 224 (15.9) | 704 (10.9) | 1299 (16.0) |
| Hypertension | 55 (87.3) | 1057 (74.8) | 3958 (61.1) | 4516 (55.5) |
| HFrEF | 10 (15.9) | 120 (8.5) | 276 (4.3) | 256 (3.1) |
| MI before CAG | 0 (0.0) | 22 (1.6) | 58 (0.9) | 70 (0.9) |
| MI <30 days after CAG | 0 (0.0) | 3 (0.2) | 9 (0.1) | 5 (0.1) |
| Previous PCI | 0 (0.0) | 11 (0.8) | 29 (0.4) | 48 (0.6) |
| Previous CABG | 1 (1.6) | 0 (0.0) | 1 (0.01) | 6 (0.1) |
| Cancer (any tumor) | 6 (9.5) | 115 (8.1) | 347 (5.4) | 341 (4.2) |
| Dementia | 0 (0.0) | 10 (0.7) | 13 (0.2) | 10 (0.1) |
| Chronic obstructive pulmonary disease | 6 (9.5) | 143 (10.1) | 522 (8.1) | 596 (7.3) |
| Previous nephropathy | 6 (9.5) | 31 (2.2) | 28 (0.4) | 34 (0.4) |
| Previous retinopathy | 3 (4.8) | 38 (2.7) | 80 (1.2) | 186 (2.3) |
| Previous peripheral polyneuropathy | 1 (1.6) | 20 (1.4) | 48 (0.7) | 63 (0.8) |
| Medical treatment |  |  |  |  |
| Aspirin | 40 (63.5) | 1019 (72.1) | 4457 (68.8) | 5327 (65.5) |
| ADP-inhibitors | 3 (4.8) | 67 (4.7) | 278 (4.3) | 268 (3.3) |
| Vitamin K-antagonists | 12 (19.0) | 200 (14.2) | 563 (8.7) | 453 (5.6) |
| NOAC | 3 (4.8) | 29 (2.1) | 93 (1.4) | 98 (1.2) |
| Thiazide | 13 (20.6) | 372 (26.3) | 1299 (20.1) | 1189 (14.6) |
| Statins | 40 (63.5) | 894 (63.3) | 3888 (60.1) | 4625 (56.9) |
| Calcium channel blockers | 34 (54.0) | 591 (41.8) | 2122 (32.8) | 2334 (28.7) |
| Beta blockers | 40 (63.5) | 878 (62.1) | 3416 (52.8) | 3674 (45.2) |
| ARBs | 20 (31.7) | 375 (26.5) | 1198 (18.5) | 1294 (15.9) |
| ACE-inhibitors | 28 (44.4) | 412 (29.2) | 1492 (23.0) | 1961 (24.1) |
| Insulin | 8 (12.7) | 76 (5.4) | 208 (3.2) | 353 (4.3) |
| Non-insulin | 5 (7.9) | 115 (8.1) | 447 (6.9) | 920 (11.3) |
| CCS Scale |  |  |  |  |
| Grade I | 23 (36.5) | 455 (32.2) | 2364 (36.5) | 3057 (37.6) |
| Grade II | 32 (50.8) | 845 (59.8) | 3690 (57.0) | 4541 (55.8) |
| Grade III | 4 (6.3) | 61 (4.3) | 171 (2.6) | 205 (2.5) |
| Grade IV | 0 (0.0) | 1 (0.1) | 11 (0.2) | 12 (0.1) |
| Missing | 4 (6.3) | 51 (3.6) | 238 (3.7) | 319 (3.9) |
| CCI Group |  |  |  |  |
| CCI 0 | 21 (33.3) | 828 (58.6) | 4631 (71.5) | 5873 (72.2) |
| CCI 1 | 4 (6.3) | 276 (19.5) | 1069 (16.5) | 1369 (16.8) |
| CCI 2 | 21 (33.3) | 164 (11.6) | 493 (7.6) | 498 (6.1) |
| CCI >2 | 17 (27.0) | 145 (10.3) | 281 (4.3) | 394 (4.8) |

Values are indicated as number (%), unless otherwise stated. eGFR, estimated glomerular filtration rate. SD, standard deviation. IQR, interquartile range. TIA, transient ischemic attack. AFib, atrial fibrillation. PAD, peripheral artery disease. HFrEF, heart failure with reduced ejection fraction. MI, myocardial infarction. CAG, coronary angiography. PCI, percutaneous coronary intervention. CABG, coronary artery bypass grafting. CAD, coronary artery disease. VD, vessel disease. ADP, adenosine diphosphate receptor. NOAC, non-vitamin K antagonist oral anticoagulants. ARBs, angiotensin receptor blockers. ACE, angiotensin-converting enzyme. CCS, Canadian Cardiovascular Society. CCI, Charlson Comorbidity Index.

**Supplementary table 4. Incidence rate ratios of major adverse cardiovascular events for patients stratified by CAD and eGFR.**

| eGFR  (mL/min/  1.73 m2) | Patients | Events | Events per 100  person-years  (95% CI) | Unadjusted IRR  (95% CI) | Adjusted IRR* (95% CI) | P for trend |
| --- | --- | --- | --- | --- | --- | --- |
|  | | | | | |  |
| MAJOR ADVERSE CARDIOVASCULAR EVENTS | | | | | | |
| No CAD | | | | | |  |  |  |  |  |  |
| ≥90 | 8,134 | 307 | 0.52 (0.46-0.58) | Reference | Reference |  |
| 60-89 | 6,474 | 324 | 0.68 (0.61-0.76) | 1.32 (1.13-1.55) | 1.22 (1.02-1.45) | p<0.001 |
| 45-59 | 1,138 | 82 | 1.04 (0.84-1.29) | 2.01 (1.57-2.56) | 1.42 (1.08-1.87) |  |
| 30-44 | 275 | 40 | 2.39 (1.76-3.26) | 4.63 (3.34-6.41) | 2.35 (1.63-3.40) |  |
| 15-29 | 44 | 5 | 2.04 (0.85-4.90) | 3.94 (1.62-9.59) | 1.58 (0.52-4.80) |  |
| <15 | 19 | 3 | 2.78 (0.90-8.63) | 5.38 (1.72-16.81) | 3.86 (1.24-11.99) |  |
|  |  |  |  |  |  |  |
| CAD |  |  |  |  |  |  |
| ≥90 | 12,011 | 1,272 | 1.67 (1.58-1.76) | Reference | Reference |  |
| 60-89 | 10,978 | 1,450 | 2.09 (1.98-2.20) | 1.25 (1.16-1.35) | 1.08 (0.99-1.17) | p<0.001 |
| 45-59 | 2,406 | 471 | 3.34 (3.05-3.66) | 2.00 (1.80-2.23) | 1.42 (1.25-1.60) |  |
| 30-44 | 897 | 241 | 5.50 (4.85-6.24) | 3.30 (2.87-3.79) | 1.93 (1.65-2.27) |  |
| 15-29 | 198 | 62 | 7.27 (5.57-9.33) | 4.36 (3.38-5.63) | 2.59 (2.00-3.36) |  |
| <15 | 37 | 9 | 5.19 (2.70-9.97) | 3.11 (1.61-6.00) | 2.69 (1.45-5.01) |  |

Risk of major adverse cardiovascular events after coronary angiography for patients with and without CAD stratified by kidney function. IRR, incidence rate ratio. eGFR, estimated glomerular filtration rate.*We adjusted for age category (<65, 65-74, and ≥75), sex, BMI category (<18.5, 18.5-24, 25-29, and ≥30) (imputed), active smoking (imputed), hypertension, peripheral artery disease, previous ischemic stroke, Diabetes Mellitus, coronary artery disease category, oral anticoagulant treatment, antiplatelet treatment, statin treatment, heart failure with reduced ejection fraction, and atrial fibrillation.

**Supplementary table 5. Incidence rate ratios of major adverse cardiovascular events for patients stratified by extent of CAD and eGFR**

| eGFR  (mL/min/  1.73 m2) | Patients | Events | Events per 100  person-years  (95% CI) | Unadjusted IRR  (95% CI) | Adjusted IRR* (95% CI) | P for trend |
| --- | --- | --- | --- | --- | --- | --- |
|  | | | | | |  |
| MAJOR ADVERSE CARDIOVASCULAR EVENTS | | | | | | |
| Diffuse CAD | | | | | |  |  |  |  |  |  |
| ≥90 | 2,440 | 156 | 1.08 (0.92-1.26) | Reference | Reference |  |
| 60-89 | 2,059 | 136 | 1.12 (0.95-1.33) | 1.04 (0.83-1.31) | 0.95 (0.73-1.23) | p<0.001 |
| 30-59 | 567 | 51 | 1.64 (1.25-2.16) | 1.53 (1.12-2.09) | 1.18 (0.81-1.72) |  |
| <30 | 33 | 6 | 5.06 (2.27-11.26) | 4.69(2.02-10.88) | 2.87 (1.18-6.98) |  |
|  |  |  |  |  |  |  |
| Single-vessel CAD | | | | | | |
| ≥90 | 4,560 | 412 | 1.40 (1.27-1.54) | Reference | Reference |  |
| 60-89 | 3,894 | 401 | 1.58 (1.43-1.74) | 1.13 (0.98-1.29) | 1.05 (0.90-1.22) | p<0.001 |
| 30-59 | 1,044 | 199 | 3.24 (2.82-3.73) | 2.32 (1.96-2.75) | 1.62 (1.31-2.00) |  |
| <30 | 73 | 19 | 5.49 (3.50-8.61) | 3.92 (2.50-6.16) | 2.78 (1.74-4.45) |  |
|  |  |  |  |  |  |  |
| Multivessel CAD | | | | | | |
| ≥90 | 5,011 | 704 | 2.17 (2.02-2.34) | Reference | Reference |  |
| 60-89 | 5,025 | 913 | 2.86 (2.68-3.05) | 1.31 (1.9-1.45) | 1.12 (1.01-1.25) | p<0.001 |
| 30-59 | 1,692 | 462 | 5.00 (4.56-5.47) | 2.30 (2.04-2.59) | 1.60 (1.39-1.85) |  |
| <30 | 129 | 46 | 8.19 (6.14-10.94) | 3.77 (2.79-5.10) | 2.60 (1.91-3.53) |  |

Risk of major adverse cardiovascular events after coronary angiography stratified by CAD extent and kidney function. CAD extent was categorized as diffuse, non-significant CAD, obstructive single-vessel CAD, or obstructive multivessel CAD. IRR, incidence rate ratio. eGFR, estimated glomerular filtration rate.*We adjusted for age category (<65, 65-74, and ≥75), sex, active smoking (imputed), hypertension, peripheral artery disease, previous ischemic stroke, Diabetes Mellitus, oral anticoagulant treatment, antiplatelet treatment, statin treatment, heart failure with reduced ejection fraction, and atrial fibrillation.

**Supplementary table 6. Incidence rate ratios of major adverse cardiovascular events for patients stratified by CAD, LVEF and eGFR.**

| eGFR  (mL/min/  1.73 m2) | Patients | Events | Events per 100  person-years  (95% CI) | Unadjusted IRR  (95% CI) | Adjusted IRR* (95% CI) | P for trend |
| --- | --- | --- | --- | --- | --- | --- |

| MAJOR ADVERSE CARDIOVASCULAR EVENTS | | | | | | |
| --- | --- | --- | --- | --- | --- | --- |
| No CAD and LVEF>40% | | | | | |  |  |  |  |  |  |
| ≥90 | 4,654 | 155 | 0.49 (0.42-0.57) | Reference | Reference |  |
| 60-89 | 3,448 | 143 | 0.61 (0.52-0.72) | 1.26 (1.00-1.58) | 1.13 (0.88-1.45) | p<0.001 |
| 30-59 | 729 | 48 | 1.03 (0.78-1.37) | 2.11 (1.53-2.92) | 1.38 (0.92-2.05) |  |
| <30 | 28 | 3 | 1.69 (0.55-5.25) | 3.47 (1.05-11.45) | 1.80 (0.49-6.65) |  |
|  |  |  |  |  |  |  |
| No CAD and LVEF≤40% | | | | | | |
| ≥90 | 106 | 10 | 1.35 (0.73-2.52) | Reference | Reference |  |
| 60-89 | 105 | 15 | 2.29 (1.38-3.81) | 1.70 (0.77-3.76) | 1.33 (0.50-3.51) | p<0.001 |
| 30-59 | 47 | 5 | 1.99 (0.83-4.77) | 1.47 (0.51-4.22) | 0.43 (0.11-1.71) |  |
| <30 | 3 | 0 | - | - | - |  |
|  |  |  |  |  |  |  |
| CAD and LVEF>40% | | | | | | |
| ≥90 | 7,607 | 681 | 1.50 (1.40-1.62) | Reference | Reference |  |
| 60-89 | 6,324 | 697 | 1.87 (1.73-2.01) | 1.24 (1.12-1.38) | 1.04 (0.92-1.17) | p<0.001 |
| 30-59 | 1,698 | 312 | 3.47 (3.11-3.88) | 2.31 (2.02-2.64) | 1.50 (1.28-1.77) |  |
| <30 | 115 | 33 | 7.30 (5.19-10.26) | 4.85 (3.42-6.88) | 2.85 (1.98-4.09) |  |
| CAD and LVEF≤40% | | | | | |  |
| ≥90 | 348 | 63 | 3.16 (2.47-4.05) | Reference | Reference |  |
| 60-89 | 397 | 95 | 4.33 (3.54-5.29) | 1.37 (0.99-1.88) | 1.35 (0.94-1.92) | p<0.001 |
| 30-59 | 235 | 61 | 5.72 (4.45-7.36) | 1.81 (1.27-2.58) | 1.75 (1.13-2.70) |  |
| <30 | 17 | 6 | 8.77 (3.94-19.52) | 2.77 (1.15-6.70) | 3.14 (1.32-7.44) |  |

Risk of major adverse cardiovascular events after coronary angiography for patients with and without CAD, LVEF> 40% or LVEF≤40 % and stratified by kidney function. IRR, incidence rate ratio. eGFR, estimated glomerular filtration rate.*We adjusted for age category (<65, 65-74, and ≥75), sex, BMI category (<18.5, 18.5-24, 25-29, and ≥30) (imputed), active smoking (imputed), hypertension, peripheral artery disease, previous ischemic stroke, Diabetes Mellitus, coronary artery disease category, oral anticoagulant treatment, antiplatelet treatment, statin treatment and atrial fibrillation.

**Supplementary table 7. Incidence rate ratios of clinical outcomes.**

| eGFR  (mL/min/  1.73 m2) | Person-years | Events | Events per 100  person-years  (95% CI) | Unadjusted IRR  (95% CI) | Adjusted IRR* (95% CI) | P for trend |
| --- | --- | --- | --- | --- | --- | --- |
|  | | | | | |  |
| MYOCARDIAL INFARCTION | | | | | | |
| ≥90 | 137,231 | 877 | 0.64 (0.60-0.68) | Reference | Reference |  |
| 60-89 | 118,430 | 884 | 0.75 (0.70-0.80) | 1.17 (1.06-1.28) | 1.10 (0.99-1.22) | p<0.001 |
| 30-59 | 28,602 | 363 | 1.27 (1.15-1.41) | 1.99 (1.76-2.25) | 1.53 (1.32-1.77) |  |
| <30 | 1,419 | 36 | 2.54 (1.83-3.52) | 3.97 (2.84-5.56) | 2.63 (1.86-3.72) |  |
|  | | | | | | |
| ISCHEMIC STROKE | | | | | | |
| ≥90 | 138,641 | 474 | 0.34 (0.31-0.37) | Reference | Reference |  |
| 60-89 | 119,611 | 538 | 0.45 (0.41-0.49) | 1.32 (1.16-1.49) | 1.07 (0.93-1.23) | p<0.001 |
| 30-59 | 29,045 | 221 | 0.76 (0.67-0.87) | 2.23 (1.90-2.61) | 1.30 (1.07-1.58) |  |
| <30 | 1,448 | 18 | 1.24 (0.78-1.97) | 3.64 (2.27-5.82) | 1.82 (1.12-2.96) |  |
|  |  |  |  |  |  |  |
| ALL-CAUSE MORTALITY | | | | | | |
| ≥90 | 140,300 | 2,128 | 1.52 (1.45-1.58) | Reference | Reference |  |
| 60-89 | 121,392 | 3,002 | 2.47 (2.39-2.56) | 1.63 (1.54-1.72) | 1.14 (1.07-1.21) | p<0.001 |
| 30-59 | 29,640 | 1,642 | 5.54 (5.28-5.81) | 3.65 (3.43-3.89) | 1.73 (1.61-1.87) |  |
| <30 | 1,500 | 162 | 10.80 (9.26-12.59) | 7.12 (6.13-8.27) | 3.01 (2.58-3.51) |  |

Risk of myocardial infarction, ischemic stroke, major adverse cardiovascular events, and all-cause mortality stratified according to kidney function strata. eGFR, estimated glomerular filtration rate. IRR, incidence rate ratio.
*In the case of myocardial infarction, we adjusted for age category (<65, 65-74, and ≥75), sex, BMI category (<18.5, 18.5-24, 25-29, and ≥30) (imputed), active smoking (imputed), hypertension, peripheral artery disease, previous ischemic stroke, Diabetes Mellitus, coronary artery disease category, oral anticoagulant treatment, antiplatelet treatment, and statin treatment. In the case of ischemic stroke and MACE, we additionally adjusted for heart failure with reduced ejection fraction, atrial fibrillation. In the case of all-cause mortality, we adjusted for age category (<65, 65-74, and ≥75), sex, BMI (category) (imputed), active smoking (imputed), hypertension, coronary artery disease category, modified CCI group, oral anticoagulant treatment, antiplatelet treatment, and statin treatment.

**Supplementary table 8. Incidence rate ratios of clinical outcomes.**

| eGFR  (mL/min/  1.73 m2) | Person-years | Events | Events per 100  person-years  (95% CI) | Unadjusted IRR  (95% CI) | Adjusted IRR* (95% CI) | P for trend |
| --- | --- | --- | --- | --- | --- | --- |
|  | | | | | |  |
| MYOCARDIAL INFARCTION | | | | | | |
| No CAD | | | | | |  |
| ≥90 | 59,868 | 142 | 0.24 (0.20-0.28) | Reference | Reference |  |
| 60-89 | 47,816 | 135 | 0.28 (0.24-0.33) | 1.19 (0.94-1.51) | 1.27 (0.98-1.65) | p<0.001 |
| 30-59 | 9,722 | 44 | 0.45 (0.34-0.61) | 1.91 (1.36-2.67) | 1.73 (1.17-2.55) |  |
| <30 | 366 | 3 | 0.82 (0.26-2.54) | 3.45 (1.11-10.76) | 2.82 (0.88-9.01) |  |
|  |  |  |  |  |  |  |
| CAD |  |  |  |  |  |  |
| ≥90 | 77,363 | 735 | 0.95 (0.88-1.02) | Reference | Reference |  |
| 60-89 | 70,614 | 749 | 1.06 (0.99-1.14) | 1.12 (1.01-1.24) | 1.08 (0.96-1.20) | p<0.001 |
| 30-59 | 18,880 | 319 | 1.69 1.51-1.89) | 1.78 (1.56-2.03) | 1.48 (1.27-1.74) |  |
| <30 | 1,052 | 33 | 3.14 (2.23-4.41) | 3.30 (2.32-4.70) | 2.57 (1.78-3.70) |  |
|  | | | | | | |
| ISCHEMIC STROKE | | | | | | |
| No CAD | | | | | | |
| ≥90 | 59,794 | 134 | 0.22 (0.19-0.27) | Reference | Reference |  |
| 60-89 | 47,774 | 138 | 0.29 (0.24-0.34) | 1.29 (1.02-1.64) | 1.17 (0.89-1.52) | p<0.001 |
| 30-59 | 9,699 | 55 | 0.57 (0.44-0.74) | 2.53 (1.85-3.46) | 1.62 (1.11-2.35) |  |
| <30 | 355 | 3 | 0.84 (0.27-2.62) | 3.77 (1.20-11.83) | 1.48 (0.37-5.94) |  |
|  |  |  |  |  |  |  |
| CAD |  |  |  |  |  |  |
| ≥90 | 78,847 | 340 | 0.43 (0.39-0.48) | Reference | Reference |  |
| 60-89 | 71,837 | 400 | 0.56 (0.50-0.61) | 1.29 (1.12-1.49) | 1.04 (0.88-1.23) | p<0.001 |
| 30-59 | 19,345 | 166 | 0.86 (0.74-1.00) | 1.99 (1.65-2.40) | 1.22 (0.97-1.52) |  |
| <30 | 1,093 | 15 | 1.37 (0.83-2.28) | 3.18 (1.90-5.34) | 1.83 (1.08-3.08) |  |
|  |  |  |  |  |  |  |
| ALL-CAUSE MORTALITY | | | | | | |
| No CAD | | | | | |  |
| ≥90 | 60,321 | 613 | 1.02 (0.94-1.10) | Reference | Reference |  |
| 60-89 | 48,286 | 738 | 1.53 (1.42-1.64) | 1.50 (1.35-1.67) | 1.14 (1.01-1.29) | p<0.001 |
| 30-59 | 9,847 | 329 | 3.34 (3.00-3.72) | 3.29 (2.88-3.75) | 1.63 (1.38-1.92) |  |
| <30 | 369 | 25 | 6.78 (4.58-10.04) | 6.67 (4.50-9.90) | 3.00 (1.92-4.70) |  |
|  |  |  |  |  |  |  |
| CAD |  |  |  |  |  |  |
| ≥90 | 79,979 | 1515 | 1.89 (1.80-1.99) | Reference | Reference |  |
| 60-89 | 73,105 | 2264 | 3.10 (2.97-3.23) | 1.63 (1.53-1.74) | 1.15 (1.07-1.23) | p<0.001 |
| 30-59 | 19,794 | 1313 | 6.63 (6.28-7.00) | 3.50 (3.26-3.76) | 1.76 (1.62-1.91) |  |
| <30 | 1,132 | 137 | 12.10 (10.24-14.31) | 6.39 (5.44-7.50) | 3.02 (2.56-3.56) |  |

Risk of myocardial infarction, ischemic stroke, and all-cause mortality after coronary angiography stratified by kidney function strata and coronary artery disease. eGFR, estimated glomerular filtration rate. IRR, incidence rate ratio. CAD, coronary artery disease.
*In the case of myocardial infarction, we adjusted for age category (<65, 65-74, and ≥75), sex, BMI category (<18.5, 18.5-24, 25-29, and ≥30) (imputed), active smoking (imputed), hypertension, peripheral artery disease, previous ischemic stroke, Diabetes Mellitus, coronary artery disease category, oral anticoagulant treatment, antiplatelet treatment, and statin treatment. In the case of ischemic stroke, we additionally adjusted for heart failure with reduced ejection fraction, atrial fibrillation. In the case of death, we adjusted for age category (<65, 65-74, and ≥75), sex, BMI (category) (imputed), active smoking (imputed), hypertension, coronary artery disease category, modified CCI group, oral anticoagulant treatment, antiplatelet treatment, and statin treatment.

**Supplementary table 9. Incidence rate ratios of major adverse cardiovascular events with non-body surface area corrected kidney function.**

| eGFR  (mL/min/  1.73 m2) | Person-years | Events | Events per 100  person-years  (95% CI) | Unadjusted IRR  (95% CI) | Adjusted IRR* (95% CI) | P for trend | |
| --- | --- | --- | --- | --- | --- | --- | --- |
|  | | | | | | |  | |
| MAJOR ADVERSE CARDIOVASCULAR EVENTS | | | | | | | | |
|  | | | | | | |  | |  |  |  |  |  |
| ≥90 | 84121 | 875 | 1.16 (1.11-1.22) | Reference | Reference |  | |
| 60-89 | 156992 | 2,231 | 1.52 (1.45-1.59) | 1.37 (1.26-1.48) | 1.04 (0.95-1.13) | p<0.001 | |
| 30-59 | 38867 | 1,039 | 2.97 (2.78-3.18) | 2.57 (2.35-2.81) | 1.34 (1.20-1.49) |  | |
| <30 | 1,904 | 121 | 5.73 (4.60-7.14) | 6.11 (5.04-7.40) | 2.58 (2.10-3.17) |  | |

Risk of major adverse cardiovascular events after coronary angiography stratified by kidney function strata. IRR, incidence rate ratio. eGFR, estimated glomerular filtration rate.

*We adjusted for age category (<65, 65-74, and ≥75), sex, BMI category (<18.5, 18.5-24, 25-29, and ≥30) (imputed), active smoking (imputed), hypertension, peripheral artery disease, previous ischemic stroke, Diabetes Mellitus, coronary artery disease category, oral anticoagulant treatment, antiplatelet treatment, statin treatment, heart failure with reduced ejection fraction, and atrial fibrillation.

**Supplementary table 10. Incidence rate ratios of major adverse cardiovascular events without adjustment for body mass index.**

| eGFR  (mL/min/  1.73 m2) | Person-years | Events | Events per 100  person-years  (95% CI) | Unadjusted IRR  (95% CI) | Adjusted IRR* (95% CI) | P for trend | |
| --- | --- | --- | --- | --- | --- | --- | --- |
|  | | | | | | |  | |
| MAJOR ADVERSE CARDIOVASCULAR EVENTS | | | | | | | | |
|  | | | | | | |  | |
| ≥90 | 84121 | 875 | 1.16 (1.11-1.22) | Reference | Reference |  | |
| 60-89 | 156992 | 2,231 | 1.52 (1.45-1.59) | 1.37 (1.26-1.48) | 1.10 (1.02-1.19) | p<0.001 | |
| 30-59 | 38867 | 1,039 | 2.97 (2.78-3.18) | 2.57 (2.35-2.81) | 1.58 (1.43-1.75) |  | |
| <30 | 1,904 | 121 | 5.73 (4.60-7.14) | 6.11 (5.04-7.40) | 2.57 (2.03-3.26) |  | |

Risk of major adverse cardiovascular events after coronary angiography stratified by kidney function strata. IRR, incidence rate ratio. eGFR, estimated glomerular filtration rate.*We adjusted for age category (<65, 65-74, and ≥75), sex, active smoking (imputed), hypertension, peripheral artery disease, previous ischemic stroke, Diabetes Mellitus, coronary artery disease category, oral anticoagulant treatment, antiplatelet treatment, statin treatment, heart failure with reduced ejection fraction, and atrial fibrillation.
